# Supplementary material
Source: PubMed Central journal article supplement (PMC4854203)
Supplement: NIHMS779759-supplement-DeRybel_Suppl.pdf [file NIHMS779759-supplement-DeRybel_Suppl.pdf]

## Supplemental Data

Chemical Inhibition of a Subset  
of *Arabidopsis Thaliana* GSK3-like Kinases

## Activates Brassinosteroid Signaling

Bert De Rybel, Dominique Audenaert, Grégory Vert, Wilfried Rozhon, Juliane Mayerhofer, Frank Peelman, Silvie Coutuer, Tinneke Denayer, Leentje Jansen, Long Nguyen, Isabelle Vanhoutte, Gerrit T.S. Beemster, Kris Vleminckx, Claudia Jonak, Joanne Chory, Dirk Inzé, Eugenia Russinova, and Tom Beckman

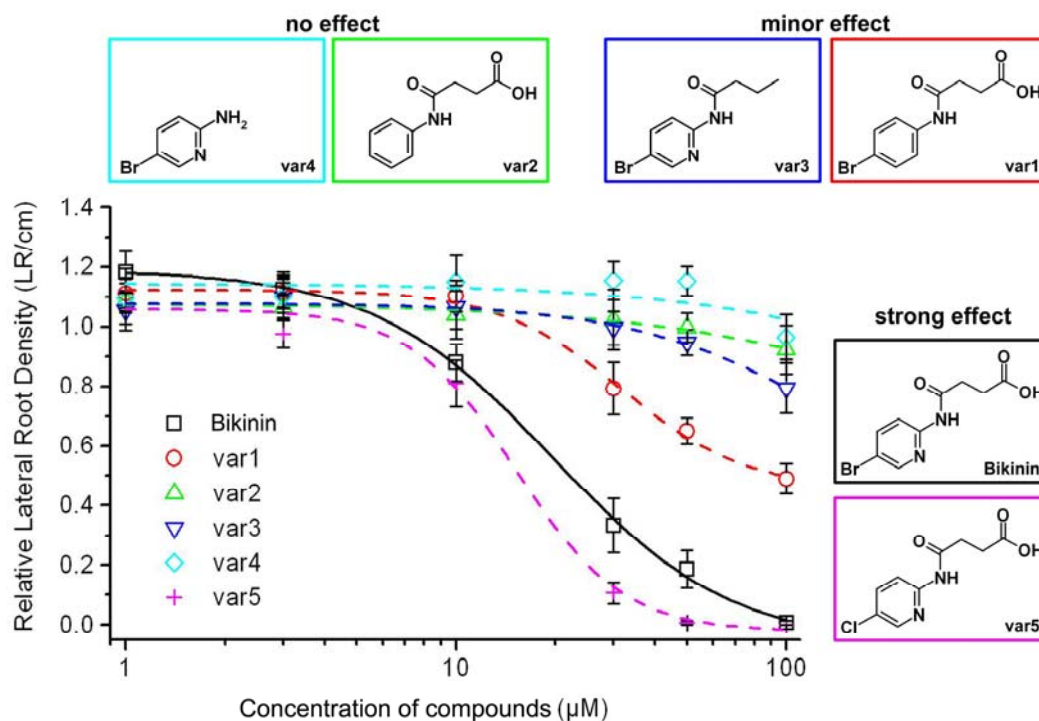

**Figure S1. Decrease of Lateral Root Density by Bikinin and Its Variants**

Dose-response analysis of bikinin and its derivate structures. Three days after germination, seedlings were transferred to medium containing bikinin or DMSO and grown for an additional seven days. Lateral root density (number of lateral roots/cm) of compound-treated plants was compared to DMSO-treated plants (relative lateral root density). All results are means  $\pm$  s.e. ( $n \geq 10$  for each data point) and experiments were repeated at least twice.

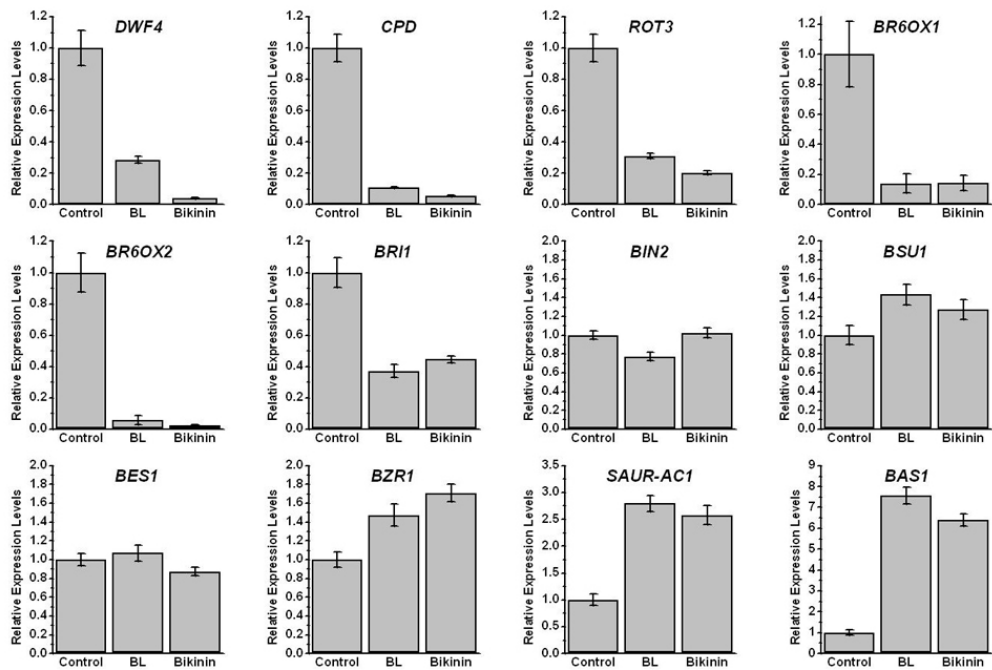

**Figure S2. Transcriptional Regulation of the BR Pathway by Bikinin and BL**  
 Quantitative RT-PCR experiment measuring the relative expression levels of five BR-biosynthetic genes (*DWF4*, *CPD*, *ROT3*, *BR6OX1*, and *BR6OX2*), five BR-regulated genes (*BRI1*, *BIN2*, *BSU1*, *BES1*, and *BZR1*), and two BR-upregulated genes (*SAUR-AC1* and *BAS1*) on 3-day-old seedlings after treatment with BL (1 μM) or bikinin (30 μM) for 6 h compared to DMSO-treated controls. All results are means ± s.d. Individual reactions were done in triplicate and experiments were repeated at least twice.

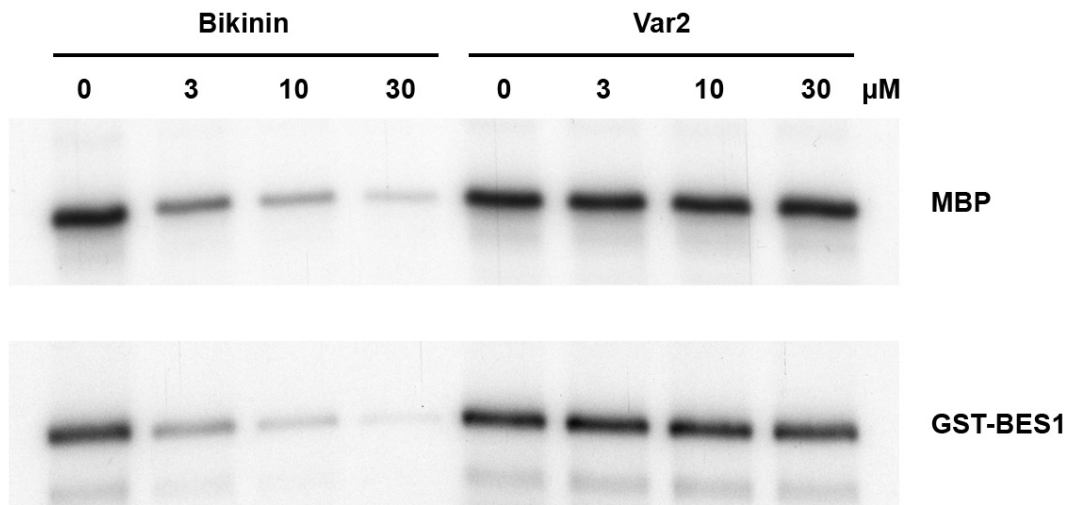

**Figure S3. Autoradiography of a Kinase Assay with GST-BIN2**  
 A concentration gradient of Bikinin or the inactive variant 2 were assayed and either MBP or GST-BES1 was used as a substrate.

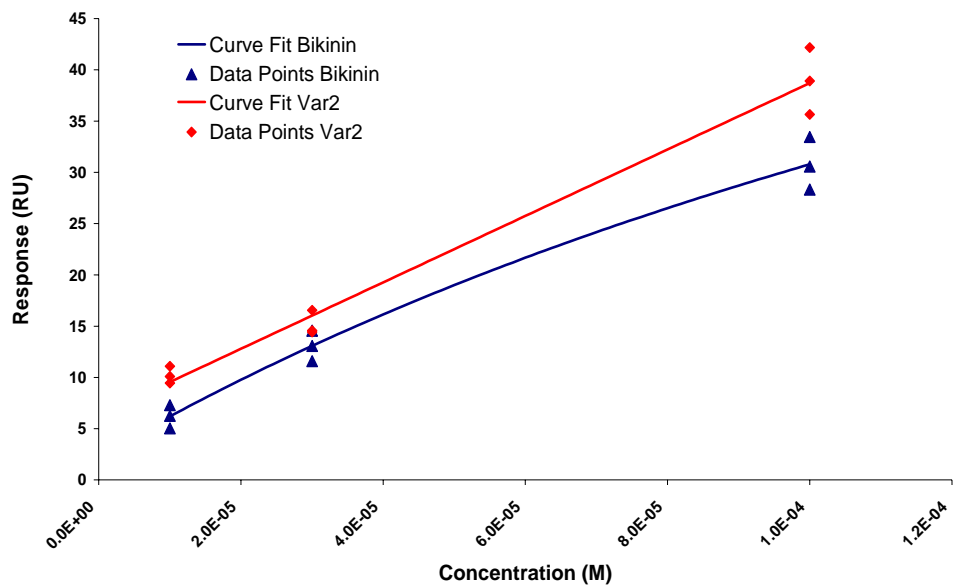

|                | <b>KD (M)</b>   | Rmax (RU) | offset (RU) | Chi <sup>2</sup> (RU <sup>2</sup> ) |
|----------------|-----------------|-----------|-------------|-------------------------------------|
| <b>Bikinin</b> | <b>2.41E-04</b> | 97.1      | 2.3         | 3.37                                |
| <b>Var2</b>    | <b>4.899</b>    | 1587401.3 | 6.3         | 4.83                                |

**Figure S4. Affinity Curves for Bikinin and var2 (Top) and Calculated Affinity Parameters for Both Compounds (Bottom)**

Reference and blank data are subtracted. The experiment was done in triplicate for each concentration.

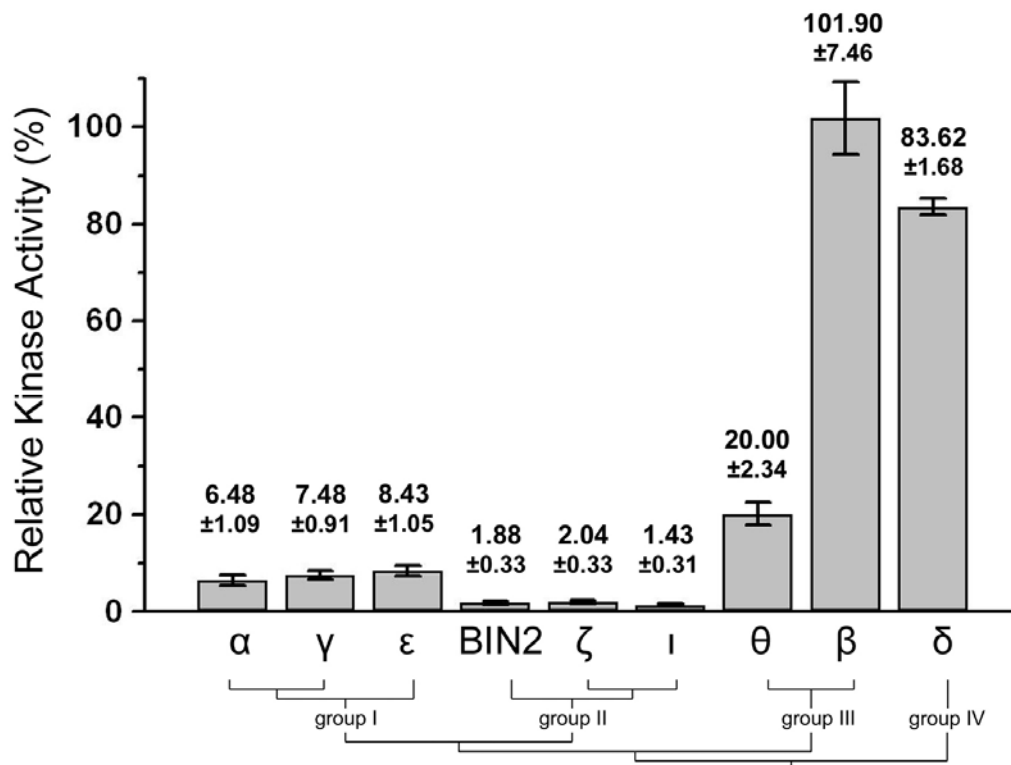

**Figure S5. Quantification of the Inhibitory Effect of 10  $\mu$ M Bikinin on ASK Activity**

The activity without bikinin was set to 100% for each kinase. All results are represented as means  $\pm$  s.d. Experiments were repeated four times.

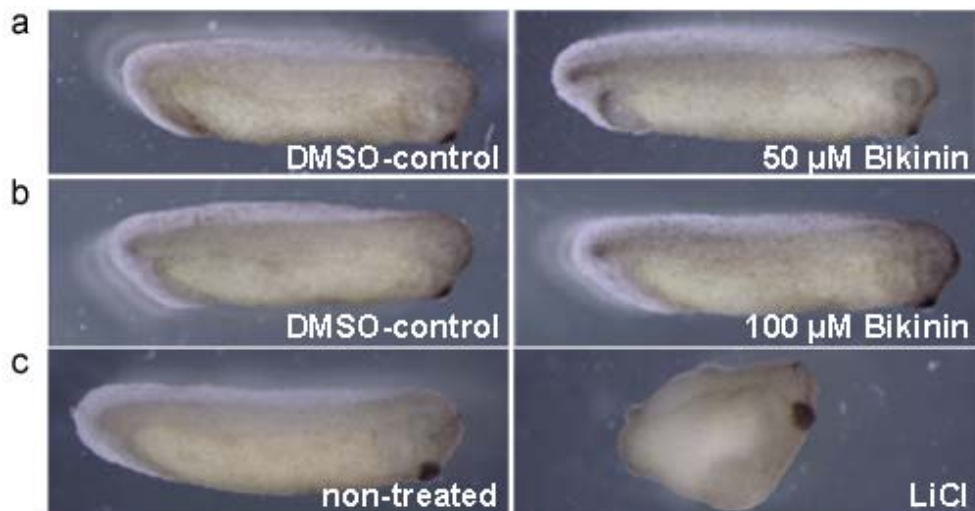

**Figure S6. In Vivo Effect of Bikinin on *Xenopus laevis* Embryos**

Early blastula embryos ( $\pm$  32-cell stage) of *Xenopus* were treated for 24 h with 50  $\mu$ M or 100  $\mu$ M bikinin (A and B) in 0.1x Marc's modified Ringer's (MMR) solution (0.01 M NaCl; 0.18 mM KCl; 0.2 mM CaCl<sub>2</sub>; 0.1 mM MgCl<sub>2</sub>; 0.5 mM HEPES, pH 7.6) and those treated with DMSO were used as negative controls (A and B). As a standard test to induce dorsalization, early blastula embryos were treated with 0.3 M LiCl for 10 min (C). Embryos were washed several times with 0.1x MMR and photographed 48 hr later.

**SI - Table 1.** In vitro effect of 1  $\mu$ M bikinin and 10  $\mu$ M bikinin on the remaining activity of 77 human kinases (means  $\pm$  s.d.; experiments were performed in triplicate)

| Tested Kinase name | residual activity when treated with 1 $\mu$ M bikinin |       | residual activity when treated with 10 $\mu$ M bikinin |       |
|--------------------|-------------------------------------------------------|-------|--------------------------------------------------------|-------|
|                    | mean                                                  | s.d.  | mean                                                   | s.d.  |
| MKK1               | 89.5                                                  | 4.65  | 98.4                                                   | 5.56  |
| ERK1               | 78.0                                                  | 7.61  | 78.7                                                   | 6.79  |
| ERK2               | 84.6                                                  | 9.86  | 83.0                                                   | 9.68  |
| JNK1               | 111.3                                                 | 3.01  | 112.0                                                  | 2.18  |
| JNK2               | 118.9                                                 | 4.00  | 93.0                                                   | 0.73  |
| JNK3               | 89.0                                                  | 6.45  | 85.8                                                   | 12.39 |
| p38a MAPK          | 88.9                                                  | 8.56  | 100.6                                                  | 3.39  |
| P38b MAPK          | 86.6                                                  | 8.48  | 95.1                                                   | 10.79 |
| p38g MAPK          | 99.6                                                  | 6.43  | 101.3                                                  | 9.15  |
| p38s MAPK          | 109.2                                                 | 4.00  | 85.0                                                   | 1.91  |
| ERK8               | 94.9                                                  | 12.44 | 70.4                                                   | 5.42  |
| RSK1               | 95.0                                                  | 8.89  | 79.6                                                   | 1.34  |
| RSK2               | 107.7                                                 | 13.69 | 117.6                                                  | 0.13  |
| PDK1               | 88.0                                                  | 3.50  | 87.9                                                   | 0.13  |
| PKBa               | 111.0                                                 | 13.04 | 116.2                                                  | 7.00  |
| PKBb               | 95.7                                                  | 14.94 | 91.9                                                   | 11.17 |
| SGK1               | 106.9                                                 | 5.00  | 107.4                                                  | 6.00  |
| S6K1               | 97.0                                                  | 4.08  | 90.0                                                   | 4.32  |
| PKA                | 88.6                                                  | 2.45  | 92.9                                                   | 4.70  |
| ROCK 2             | 92.6                                                  | 0.15  | 102.5                                                  | 14.08 |
| PRK2               | 88.0                                                  | 14.76 | 72.6                                                   | 4.45  |
| PKCa               | 87.6                                                  | 2.77  | 80.2                                                   | 7.33  |
| PKC zeta           | 107.4                                                 | 9.82  | 99.1                                                   | 14.50 |
| PKD1               | 97.4                                                  | 4.44  | 96.4                                                   | 12.79 |
| MSK1               | 104.7                                                 | 2.18  | 113.6                                                  | 9.45  |
| MNK1               | 80.5                                                  | 1.59  | 84.5                                                   | 1.18  |
| MNK2               | 109.3                                                 | 4.09  | 92.3                                                   | 4.00  |
| MAPKAP-K2          | 93.0                                                  | 6.61  | 105.3                                                  | 11.04 |
| MAPKAP-K3          | 110.9                                                 | 7.50  | 118.2                                                  | 6.95  |
| PRAK               | 84.7                                                  | 2.82  | 88.2                                                   | 4.20  |
| CAMKKb             | 97.0                                                  | 7.37  | 83.5                                                   | 3.00  |
| CAMK1              | 86.3                                                  | 4.07  | 91.4                                                   | 12.83 |
| SmMLCK             | 96.2                                                  | 2.04  | 122.4                                                  | 12.50 |
| PHK                | 92.5                                                  | 6.04  | 94.9                                                   | 13.30 |
| CHK1               | 99.7                                                  | 2.40  | 103.9                                                  | 0.26  |
| CHK2               | 92.7                                                  | 0.00  | 101.1                                                  | -     |
| <b>GSK3b</b>       | 80.5                                                  | 4.67  | 54.4                                                   | 0.21  |
| CDK2-Cyclin A      | 88.8                                                  | 3.01  | 82.5                                                   | 3.90  |
| PLK1               | 92.1                                                  | 2.40  | 85.2                                                   | 9.60  |

|                     |              |       |              |       |
|---------------------|--------------|-------|--------------|-------|
| PLK1 (Okadaic Acid) | <b>74.3</b>  | 11.42 | <b>78.2</b>  | 3.32  |
| AURORA B            | <b>72.7</b>  | 2.40  | <b>30.6</b>  | 0.82  |
| AURORA C            | <b>67.8</b>  | 7.68  | <b>57.2</b>  | 7.94  |
| AMPK                | <b>107.4</b> | 2.11  | <b>112.0</b> | 1.26  |
| MARK3               | <b>78.2</b>  | 4.90  | <b>67.5</b>  | 2.66  |
| BRSK2               | <b>108.7</b> | 5.28  | <b>109.1</b> | 12.93 |
| MELK                | <b>101.4</b> | 10.37 | <b>102.0</b> | 5.52  |
| CK1                 | <b>93.6</b>  | 4.93  | <b>66.5</b>  | 0.36  |
| CK2                 | <b>86.7</b>  | 5.15  | <b>95.1</b>  | 3.86  |
| DYRK1A              | <b>101.5</b> | 5.79  | <b>100.8</b> | 2.92  |
| DYRK2               | <b>80.1</b>  | 6.43  | <b>61.2</b>  | 2.60  |
| DYRK3               | <b>84.4</b>  | 6.78  | <b>70.5</b>  | 13.62 |
| NEK2a               | <b>100.1</b> | 7.00  | <b>100.2</b> | 12.50 |
| NEK6                | <b>105.8</b> | 12.53 | <b>106.1</b> | 0.18  |
| NEK7                | <b>101.1</b> | 9.83  | <b>93.9</b>  | 3.23  |
| IKKb                | <b>69.7</b>  | 3.77  | <b>61.2</b>  | 3.35  |
| PIM1                | <b>105.6</b> | 0.31  | <b>111.1</b> | 8.34  |
| PIM2                | <b>113.2</b> | 6.19  | <b>113.0</b> | 1.97  |
| PIM3                | <b>83.5</b>  | 2.06  | <b>93.4</b>  | 3.50  |
| SRPK1               | <b>94.8</b>  | 2.90  | <b>106.1</b> | 5.01  |
| MST2                | <b>86.5</b>  | 3.25  | <b>89.3</b>  | 3.82  |
| EF2K                | <b>103.8</b> | 10.20 | <b>94.8</b>  | 0.53  |
| HIPK2               | <b>78.4</b>  | 1.83  | <b>86.8</b>  | 8.42  |
| HIPK3               | <b>114.5</b> | 9.34  | <b>118.3</b> | 9.24  |
| PAK4                | <b>99.0</b>  | 8.00  | <b>93.2</b>  | 2.18  |
| PAK5                | <b>99.6</b>  | 1.70  | <b>105.8</b> | 9.00  |
| PAK6                | <b>97.6</b>  | 3.86  | <b>107.2</b> | 10.40 |
| Src                 | <b>117.9</b> | 3.53  | <b>97.7</b>  | 2.34  |
| Lck                 | <b>101.6</b> | 5.21  | <b>100.5</b> | 3.05  |
| CSK                 | <b>93.8</b>  | 14.49 | <b>108.8</b> | 3.92  |
| FGF-R1              | <b>98.0</b>  | 7.56  | <b>96.3</b>  | 1.59  |
| IRR                 | <b>91.6</b>  | 7.00  | <b>78.9</b>  | 7.08  |
| EPH A2              | <b>83.1</b>  | 13.12 | <b>120.5</b> | 15.35 |
| MST4                | <b>85.3</b>  | 5.92  | <b>81.0</b>  | 5.04  |
| SYK                 | <b>57.0</b>  | 7.68  | <b>85.4</b>  | 8.99  |
| YES1                | <b>113.9</b> | 0.59  | <b>98.3</b>  | 13.31 |
| IKKe                | <b>107.8</b> | 5.65  | <b>100.2</b> | 6.00  |
| TBK1                | <b>113.2</b> | 7.73  | <b>109.8</b> | 3.88  |

---

**SI - Table 2. List of the 272 significant genes.**

The p-values give the level of significance of the three effects that regulate gene expression, namely: time (duration of hormone treatment), type of hormone treatment (treatment) and treatment and time (interaction between time and hormone treatment).

| Affymetrix no. | Accession no. | Annotation                                    | 30 BIK | 30 BL  | 30 DMSO | 120 BIK | 120 BL | 120 DMSO | Fold | Orig. p-values (Treatment) | Orig. p-values (Time) | Orig. p-values (interaction) | Pbenj&hoch(Treatment) | Pbenj&hoch(Time) | Pbenj&hoch(interact) |
|----------------|---------------|-----------------------------------------------|--------|--------|---------|---------|--------|----------|------|----------------------------|-----------------------|------------------------------|-----------------------|------------------|----------------------|
| 255177_at      | AT4G08040     | 1-aminocyclopropane-1-carboxylate synth       | 5.5    | 9.1    | 70.7    | 4.7     | 4.7    | 261.5    | 56.1 | 3.1E-11                    | 1.9E-01               | 4.3E-05                      | 7.2E-07               | 4.1E-01          | 3.4E-02              |
| 245362_at      | AT4G17460     | homeobox-leucine zipper protein 1 (HAT1)      | 205.4  | 386.5  | 717.1   | 30.6    | 53.1   | 280.2    | 9.1  | 2.1E-10                    | 1.3E-11               | 4.2E-05                      | 2.4E-06               | 1.7E-08          | 3.4E-02              |
| 246284_at      | AT4G36780     | brassinosteroid signalling positive regulatc  | 157.6  | 230.2  | 324.1   | 9.8     | 25.4   | 284.9    | 29.1 | 3.2E-10                    | 7.2E-11               | 3.3E-08                      | 2.4E-06               | 5.5E-08          | 7.6E-04              |
| 257858_at      | AT3G12920     | expressed protein                             | 450.2  | 819.9  | 1006.9  | 241.7   | 324.9  | 787.5    | 3.3  | 2.4E-09                    | 1.8E-08               | 2.1E-04                      | 1.1E-05               | 2.5E-06          | 8.6E-02              |
| 261772_at      | AT1G76240     | expressed protein, contains Pfam profile F    | 126.5  | 181.0  | 318.6   | 22.7    | 49.1   | 303.7    | 13.4 | 2.2E-09                    | 3.0E-08               | 6.7E-06                      | 1.2E-05               | 3.5E-06          | 1.5E-02              |
| 256598_at      | AT3G30180     | Encodes a cytochrome p450 enzyme that         | 32.9   | 114.2  | 362.6   | 5.0     | 5.3    | 80.2     | 15.9 | 1.5E-08                    | 4.5E-09               | 2.3E-03                      | 5.9E-05               | 9.2E-07          | 2.9E-01              |
| 267305_at      | AT2G30070     | potassium transporter (KUP1), identical to    | 260.9  | 345.7  | 427.1   | 88.2    | 155.0  | 405.6    | 4.6  | 3.5E-08                    | 1.3E-07               | 3.4E-05                      | 8.9E-05               | 9.5E-06          | 3.2E-02              |
| 258196_at      | AT3G13980     | expressed protein                             | 64.4   | 181.1  | 256.8   | 10.3    | 56.0   | 125.9    | 12.2 | 3.0E-08                    | 1.5E-07               | 6.0E-03                      | 9.7E-05               | 1.0E-05          | 4.3E-01              |
| 265158_at      | AT1G31040     | zinc-binding protein-related, simialr to zinc | 13.9   | 9.0    | 10.3    | 41.9    | 10.7   | 9.6      | 4.4  | 3.4E-08                    | 2.2E-05               | 8.6E-06                      | 9.8E-05               | 3.6E-04          | 1.6E-02              |
| 261443_at      | AT1G28480     | glutaredoxin family protein, contains INTE    | 6.7    | 6.5    | 6.6     | 26.4    | 9.2    | 6.7      | 4.0  | 5.2E-08                    | 1.8E-08               | 7.7E-08                      | 1.2E-04               | 2.4E-06          | 8.8E-04              |
| 251039_at      | AT5G02020     | expressed protein                             | 4.7    | 4.6    | 4.7     | 11.2    | 4.7    | 4.9      | 2.4  | 7.4E-08                    | 3.5E-07               | 1.3E-07                      | 1.4E-04               | 1.9E-05          | 9.6E-04              |
| 261456_at      | AT1G21050     | expressed protein, contains Pfam profile F    | 258.2  | 592.9  | 819.5   | 77.3    | 124.1  | 558.8    | 7.2  | 6.9E-08                    | 1.5E-07               | 9.9E-04                      | 1.4E-04               | 1.0E-05          | 1.9E-01              |
| 247191_at      | AT5G65310     | homeobox-leucine zipper protein 5 (HB-5)      | 622.8  | 625.6  | 690.7   | 83.4    | 113.3  | 420.7    | 5.0  | 1.1E-07                    | 1.8E-11               | 4.8E-07                      | 1.8E-04               | 1.8E-08          | 2.2E-03              |
| 245784_at      | AT1G32190     | expressed protein                             | 134.9  | 186.0  | 185.3   | 12.1    | 18.8   | 169.8    | 14.1 | 1.0E-07                    | 1.5E-09               | 5.9E-07                      | 1.8E-04               | 4.8E-07          | 2.3E-03              |
| 261892_at      | AT1G80840     | WRKY family transcription factor, similar t   | 106.8  | 66.2   | 248.1   | 190.9   | 51.7   | 949.4    | 18.3 | 1.6E-07                    | 1.9E-03               | 2.3E-03                      | 2.5E-04               | 1.1E-02          | 2.9E-01              |
| 257642_at      | AT3G25710     | basic helix-loop-helix (bHLH) family proteir  | 79.3   | 177.3  | 166.5   | 12.0    | 61.7   | 117.2    | 9.8  | 1.7E-07                    | 2.8E-07               | 3.0E-04                      | 2.5E-04               | 1.6E-05          | 1.0E-01              |
| 250327_at      | AT5G12050     | expressed protein                             | 2775.0 | 3909.6 | 5320.3  | 773.6   | 967.0  | 2870.0   | 3.7  | 2.0E-07                    | 1.9E-09               | 1.2E-03                      | 2.7E-04               | 5.3E-07          | 2.0E-01              |
| 253828_at      | AT4G27970     | C4-dicarboxylate transporter/malic acid tra   | 160.8  | 79.2   | 66.1    | 308.2   | 129.8  | 101.5    | 3.0  | 2.5E-07                    | 1.1E-05               | 4.7E-01                      | 3.1E-04               | 2.2E-04          | 7.2E-01              |
| 259848_at      | AT1G72180     | leucine-rich repeat transmembrane proteir     | 512.4  | 834.0  | 953.5   | 82.4    | 161.1  | 725.3    | 8.8  | 2.9E-07                    | 2.6E-08               | 5.5E-05                      | 3.4E-04               | 3.1E-06          | 3.8E-02              |
| 266265_at      | AT2G29340     | short-chain dehydrogenase/reductase (SD       | 394.0  | 216.8  | 253.7   | 1367.4  | 473.2  | 366.2    | 3.7  | 3.3E-07                    | 8.8E-08               | 9.8E-04                      | 3.8E-04               | 7.3E-06          | 1.9E-01              |
| 252184_at      | AT3G50660     | steroid 22-alpha-hydroxylase (CYP90B1) (      | 186.8  | 185.3  | 394.8   | 11.6    | 12.4   | 540.6    | 46.6 | 4.0E-07                    | 1.0E-06               | 2.7E-05                      | 4.1E-04               | 4.0E-05          | 2.9E-02              |
| 257374_at      | AT2G43280     | far-red impaired responsive family protein    | 85.3   | 91.7   | 108.9   | 48.5    | 51.1   | 101.2    | 2.1  | 3.9E-07                    | 1.9E-07               | 2.0E-04                      | 4.2E-04               | 1.2E-05          | 8.4E-02              |
| 261400_at      | AT1G79630     | protein phosphatase 2C family protein / Pf    | 77.6   | 97.6   | 124.6   | 26.6    | 28.8   | 76.9     | 2.9  | 5.9E-07                    | 3.3E-09               | 7.9E-04                      | 5.6E-04               | 7.8E-07          | 1.6E-01              |

|           |           |                                               |        |        |        |        |        |        |      |         |         |         |         |         |         |
|-----------|-----------|-----------------------------------------------|--------|--------|--------|--------|--------|--------|------|---------|---------|---------|---------|---------|---------|
| 265245_at | AT2G43060 | expressed protein, similar to cDNA bHLH f     | 62.9   | 93.4   | 89.3   | 25.1   | 23.5   | 82.2   | 3.5  | 6.8E-07 | 2.1E-08 | 6.3E-06 | 6.2E-04 | 2.7E-06 | 1.6E-02 |
| 247177_at | AT5G65300 | expressed protein                             | 31.7   | 25.4   | 100.7  | 27.7   | 40.6   | 111.4  | 4.0  | 7.2E-07 | 2.1E-01 | 1.1E-01 | 6.3E-04 | 4.3E-01 | 3.9E-01 |
| 262040_at | AT1G80080 | leucine-rich repeat family protein, contains  | 77.4   | 158.3  | 121.1  | 40.4   | 216.1  | 83.7   | 5.3  | 7.5E-07 | 2.4E-02 | 3.1E-03 | 6.3E-04 | 8.2E-02 | 3.2E-01 |
| 267393_at | AT2G44500 | expressed protein, contains Pfam PF0313       | 593.7  | 548.9  | 472.4  | 1465.4 | 1373.4 | 667.7  | 2.2  | 8.3E-07 | 9.0E-10 | 1.6E-04 | 6.8E-04 | 3.2E-07 | 7.4E-02 |
| 245987_at | AT5G13180 | no apical meristem (NAM) family protein, c    | 1333.7 | 1844.5 | 1727.6 | 564.1  | 715.3  | 1436.1 | 2.5  | 1.5E-06 | 1.2E-08 | 5.9E-05 | 1.2E-03 | 1.8E-06 | 4.0E-02 |
| 263002_at | AT1G54200 | expressed protein                             | 36.9   | 65.7   | 75.4   | 11.6   | 29.4   | 47.8   | 4.1  | 1.8E-06 | 1.3E-06 | 2.7E-02 | 1.3E-03 | 4.6E-05 | 3.8E-01 |
| 261382_at | AT1G05470 | endonuclease/exonuclease/phosphatase f        | 36.0   | 26.3   | 25.3   | 69.2   | 28.0   | 26.7   | 2.6  | 2.0E-06 | 1.2E-03 | 2.3E-03 | 1.4E-03 | 7.5E-03 | 2.8E-01 |
| 258100_at | AT3G23550 | MATE efflux family protein, similar to riper  | 1866.1 | 2339.0 | 2787.2 | 242.8  | 198.9  | 644.3  | 3.2  | 2.0E-06 | 1.1E-12 | 1.8E-04 | 1.4E-03 | 3.7E-09 | 8.0E-02 |
| 251321_at | AT3G61460 | zinc finger (C3HC4-type RING finger) fami     | 420.7  | 758.0  | 977.7  | 145.2  | 193.4  | 449.0  | 3.1  | 2.2E-06 | 2.4E-08 | 4.3E-02 | 1.5E-03 | 2.9E-06 | 3.2E-01 |
| 252586_at | AT3G45610 | Dof-type zinc finger domain-containing prc    | 5.8    | 5.6    | 6.2    | 14.4   | 5.9    | 5.6    | 2.6  | 2.6E-06 | 3.1E-05 | 1.8E-06 | 1.7E-03 | 4.8E-04 | 5.9E-03 |
| 258091_at | AT3G14560 | expressed protein                             | 329.7  | 458.1  | 562.7  | 188.1  | 267.1  | 536.8  | 2.9  | 2.9E-06 | 1.3E-04 | 1.6E-02 | 1.8E-03 | 1.4E-03 | 4.5E-01 |
| 250907_at | AT5G03670 | expressed protein                             | 8.1    | 8.0    | 13.3   | 7.2    | 8.4    | 22.8   | 3.2  | 3.3E-06 | 7.9E-02 | 1.5E-02 | 2.1E-03 | 2.1E-01 | 4.6E-01 |
| 251072_at | AT5G01740 | expressed protein, wound-inducible protei     | 817.4  | 1320.6 | 2478.2 | 1414.5 | 1937.4 | 4128.8 | 3.0  | 3.5E-06 | 3.5E-04 | 7.7E-01 | 2.1E-03 | 3.0E-03 | 9.0E-01 |
| 246495_at | AT5G16200 | 50S ribosomal protein-related, contains w     | 23.9   | 45.4   | 65.0   | 7.3    | 15.1   | 75.6   | 10.4 | 3.9E-06 | 4.7E-04 | 5.4E-03 | 2.3E-03 | 3.8E-03 | 4.1E-01 |
| 262124_at | AT1G59660 | nucleoporin family protein, contains Pfam     | 45.9   | 53.0   | 31.7   | 210.3  | 225.2  | 71.5   | 3.1  | 4.3E-06 | 2.7E-09 | 7.4E-03 | 2.4E-03 | 7.0E-07 | 4.5E-01 |
| 252230_at | AT3G49810 | U-box domain-containing protein, contains     | 166.4  | 114.1  | 128.7  | 180.6  | 89.9   | 161.7  | 2.0  | 4.3E-06 | 6.3E-01 | 6.7E-03 | 2.4E-03 | 8.5E-01 | 4.5E-01 |
| 267171_at | AT2G37590 | Dof-type zinc finger domain-containing prc    | 28.0   | 16.5   | 18.4   | 97.7   | 20.1   | 16.8   | 5.8  | 4.6E-06 | 1.7E-03 | 9.3E-04 | 2.4E-03 | 9.9E-03 | 1.8E-01 |
| 262543_at | AT1G34245 | expressed protein                             | 121.2  | 179.4  | 204.6  | 22.4   | 172.7  | 116.0  | 7.7  | 4.8E-06 | 4.0E-05 | 4.1E-04 | 2.5E-03 | 5.8E-04 | 1.1E-01 |
| 262550_at | AT1G31310 | hydroxyproline-rich glycoprotein family pro   | 10.5   | 7.7    | 9.0    | 26.2   | 7.9    | 10.7   | 3.3  | 5.2E-06 | 2.0E-04 | 5.9E-04 | 2.6E-03 | 1.9E-03 | 1.3E-01 |
| 253103_at | AT4G36110 | auxin-responsive protein, putative, similar   | 193.3  | 391.3  | 166.6  | 736.7  | 1253.8 | 159.4  | 7.9  | 5.1E-06 | 5.3E-05 | 2.3E-03 | 2.6E-03 | 7.1E-04 | 2.9E-01 |
| 255942_at | AT1G22360 | UDP-glucuronosyl/UDP-glucosyl transfera       | 873.1  | 1001.5 | 1066.0 | 166.3  | 151.2  | 517.1  | 3.4  | 5.5E-06 | 1.1E-10 | 4.4E-05 | 2.6E-03 | 7.5E-08 | 3.3E-02 |
| 245136_at | AT2G45210 | auxin-responsive protein-related, weakly s    | 122.4  | 275.5  | 359.6  | 90.8   | 80.1   | 372.5  | 4.7  | 5.5E-06 | 1.2E-03 | 2.5E-03 | 2.7E-03 | 7.6E-03 | 3.0E-01 |
| 245325_at | AT4G14130 | xyloglucan:xyloglucosyl transferase, putati   | 63.3   | 146.7  | 172.3  | 6.9    | 26.3   | 346.3  | 50.3 | 6.2E-06 | 5.2E-04 | 5.0E-04 | 2.9E-03 | 4.1E-03 | 1.2E-01 |
| 259985_at | AT1G76620 | expressed protein, contains Pfam profile F    | 12.4   | 12.9   | 13.7   | 13.2   | 17.4   | 47.4   | 3.6  | 7.6E-06 | 5.1E-06 | 3.3E-05 | 3.3E-03 | 1.3E-04 | 3.3E-02 |
| 252972_at | AT4G38840 | auxin-responsive protein, putative, auxin-ir  | 1536.2 | 1913.6 | 1520.9 | 1790.6 | 2321.5 | 916.0  | 2.5  | 7.3E-06 | 3.5E-01 | 3.2E-04 | 3.3E-03 | 6.1E-01 | 1.0E-01 |
| 253255_at | AT4G34760 | auxin-responsive family protein, auxin-ind    | 286.8  | 641.4  | 516.7  | 279.0  | 727.3  | 449.2  | 2.6  | 8.2E-06 | 8.7E-01 | 4.6E-01 | 3.4E-03 | 9.5E-01 | 7.2E-01 |
| 246063_at | AT5G19340 | expressed protein                             | 43.0   | 35.5   | 52.1   | 14.1   | 23.7   | 60.9   | 4.3  | 9.0E-06 | 1.7E-04 | 2.0E-04 | 3.7E-03 | 1.7E-03 | 8.3E-02 |
| 267628_at | AT2G42280 | basic helix-loop-helix (bHLH) family protei   | 327.0  | 479.0  | 489.0  | 119.6  | 173.9  | 428.2  | 3.6  | 1.0E-05 | 1.6E-06 | 1.1E-03 | 3.9E-03 | 5.4E-05 | 2.0E-01 |
| 253423_at | AT4G32280 | auxin-responsive AUX/IAA family protein, i    | 41.6   | 86.3   | 130.5  | 9.3    | 15.5   | 71.9   | 7.7  | 1.0E-05 | 3.4E-06 | 3.0E-02 | 3.9E-03 | 9.4E-05 | 3.5E-01 |
| 263652_at | AT1G04330 | expressed protein, EST gb:H76414 comes        | 12.5   | 11.2   | 10.7   | 56.4   | 16.6   | 12.8   | 4.4  | 1.0E-05 | 3.3E-06 | 7.5E-05 | 4.0E-03 | 9.2E-05 | 4.4E-02 |
| 254024_at | AT4G25780 | pathogenesis-related protein, putative, sirr  | 9.7    | 62.2   | 84.0   | 4.9    | 7.2    | 27.4   | 8.6  | 1.0E-05 | 1.5E-05 | 2.3E-02 | 4.0E-03 | 2.8E-04 | 4.1E-01 |
| 262635_at | AT1G06570 | 4-hydroxyphenylpyruvate dioxygenase (HF       | 314.7  | 302.7  | 346.7  | 91.2   | 85.0   | 320.1  | 3.8  | 1.1E-05 | 1.7E-07 | 7.0E-05 | 4.2E-03 | 1.1E-05 | 4.2E-02 |
| 251342_at | AT3G60690 | auxin-responsive family protein, similar to   | 178.9  | 136.8  | 220.1  | 161.9  | 102.8  | 273.8  | 2.7  | 1.2E-05 | 4.6E-01 | 4.3E-02 | 4.4E-03 | 7.2E-01 | 3.2E-01 |
| 260727_at | AT1G48100 | glycoside hydrolase family 28 protein / pol   | 8.1    | 9.3    | 8.7    | 10.7   | 32.4   | 28.0   | 3.0  | 1.2E-05 | 1.3E-08 | 1.1E-04 | 4.4E-03 | 2.0E-06 | 5.9E-02 |
| 246321_at | AT1G16640 | transcriptional factor B3 family protein, low | 7.7    | 6.9    | 6.8    | 15.5   | 6.7    | 7.0    | 2.3  | 1.3E-05 | 1.0E-03 | 2.1E-04 | 4.4E-03 | 6.8E-03 | 8.7E-02 |
| 260287_at | AT1G80440 | kelch repeat-containing F-box family prote    | 631.6  | 796.6  | 465.2  | 915.3  | 926.9  | 316.2  | 2.9  | 1.3E-05 | 6.1E-01 | 1.1E-02 | 4.4E-03 | 8.3E-01 | 4.6E-01 |



|             |              |                                                |        |        |        |         |        |        |     |         |         |         |         |         |         |
|-------------|--------------|------------------------------------------------|--------|--------|--------|---------|--------|--------|-----|---------|---------|---------|---------|---------|---------|
| 247351_at   | AT5G63790    | no apical meristem (NAM) family protein, c     | 1430.3 | 791.5  | 1629.2 | 2361.2  | 921.6  | 3426.8 | 3.7 | 1.4E-05 | 9.4E-04 | 1.2E-01 | 4.5E-03 | 6.3E-03 | 3.9E-01 |
| 259596_at   | AT1G28130    | encodes an IAA-amido synthase that conj        | 63.9   | 85.8   | 100.4  | 27.5    | 19.5   | 68.4   | 3.5 | 1.4E-05 | 1.1E-07 | 4.7E-04 | 4.5E-03 | 8.3E-06 | 1.2E-01 |
| 253812_at   | AT4G28240    | wound-responsive protein-related, wound-       | 722.2  | 1148.3 | 1483.1 | 242.7   | 304.7  | 739.8  | 3.0 | 1.5E-05 | 1.2E-07 | 5.1E-02 | 4.6E-03 | 9.0E-06 | 3.2E-01 |
| 260243_at   | AT1G63720    | expressed protein, similar to putative prote   | 10.3   | 8.2    | 11.1   | 7.9     | 8.3    | 48.8   | 6.1 | 1.6E-05 | 4.1E-03 | 1.2E-04 | 4.7E-03 | 2.0E-02 | 6.0E-02 |
| 245229_at   | AT4G25620    | hydroxyproline-rich glycoprotein family pro    | 357.0  | 616.4  | 705.5  | 280.8   | 487.0  | 568.9  | 2.0 | 1.5E-05 | 9.4E-03 | 9.9E-01 | 4.7E-03 | 3.9E-02 | 1.0E+00 |
| 247880_at   | AT5G57780    | expressed protein, similar to unknown prot     | 64.8   | 75.8   | 182.8  | 13.3    | 11.8   | 100.0  | 8.5 | 1.6E-05 | 7.1E-06 | 3.4E-02 | 4.7E-03 | 1.6E-04 | 3.3E-01 |
| 246464_at   | AT5G16980    | NADP-dependent oxidoreductase, putative        | 89.4   | 92.8   | 80.6   | 255.6   | 105.0  | 83.4   | 3.1 | 1.7E-05 | 4.3E-05 | 4.8E-05 | 4.7E-03 | 6.1E-04 | 3.4E-02 |
| 250248_at   | AT5G13740    | sugar transporter family protein, contains I   | 55.5   | 52.4   | 68.2   | 10.6    | 16.5   | 46.0   | 4.4 | 1.6E-05 | 5.4E-08 | 3.4E-04 | 4.7E-03 | 5.3E-06 | 1.1E-01 |
| 264083_at   | AT2G31230    | encodes a member of the ERF (ethylene r        | 34.3   | 26.7   | 16.1   | 120.5   | 104.2  | 38.0   | 3.2 | 1.5E-05 | 9.8E-08 | 1.5E-01 | 4.8E-03 | 7.7E-06 | 4.3E-01 |
| 253573_at   | AT4G31020    | expressed protein                              | 36.8   | 21.1   | 13.8   | 174.6   | 20.1   | 30.1   | 8.7 | 1.7E-05 | 5.3E-04 | 5.9E-03 | 4.9E-03 | 4.1E-03 | 4.3E-01 |
| 254204_at   | AT4G24160    | hydrolase, alpha/beta fold family protein, c   | 870.6  | 693.1  | 614.1  | 3839.9  | 1910.7 | 1673.7 | 2.3 | 1.8E-05 | 4.4E-10 | 1.5E-02 | 5.0E-03 | 2.0E-07 | 4.6E-01 |
| 245885_at   | AT5G09440    | phosphate-responsive protein, putative, sim    | 426.1  | 652.8  | 1123.5 | 516.1   | 509.6  | 3838.3 | 7.5 | 1.9E-05 | 3.8E-02 | 1.1E-02 | 5.2E-03 | 1.2E-01 | 4.5E-01 |
| 253281_at   | AT4G34138    | UDP-gluconosyl/UDP-glucosyl transfera          | 296.5  | 228.1  | 194.8  | 484.7   | 267.0  | 153.4  | 3.2 | 2.1E-05 | 1.2E-01 | 1.2E-02 | 5.4E-03 | 2.9E-01 | 4.6E-01 |
| 257506_at   | AT1G29440    | auxin-responsive family protein, similar to    | 702.5  | 983.2  | 673.5  | 567.0   | 788.7  | 269.1  | 2.9 | 2.1E-05 | 7.4E-05 | 3.7E-03 | 5.5E-03 | 9.2E-04 | 3.4E-01 |
| 266799_at   | AT2G22860    | phytosulfokines 2 (PSK2), identical to phyt    | 86.6   | 108.8  | 126.6  | 26.9    | 61.1   | 137.9  | 5.1 | 2.3E-05 | 2.3E-04 | 1.6E-03 | 5.8E-03 | 2.2E-03 | 2.3E-01 |
| 251910_at   | AT3G53810    | lectin protein kinase, putative, similar to re | 92.9   | 32.7   | 40.7   | 265.0   | 141.6  | 118.8  | 2.8 | 2.3E-05 | 5.7E-08 | 2.1E-01 | 5.8E-03 | 5.5E-06 | 5.0E-01 |
| 246516_at   | AT5G15740    | expressed protein, contains Pfam PF0313        | 225.5  | 275.4  | 289.8  | 175.5   | 247.5  | 357.5  | 2.0 | 2.3E-05 | 3.5E-01 | 9.4E-03 | 5.9E-03 | 6.2E-01 | 4.5E-01 |
| 248646_at   | AT5G49100    | expressed protein                              | 160.4  | 156.9  | 224.1  | 176.2   | 107.9  | 282.6  | 2.6 | 2.4E-05 | 8.2E-01 | 1.1E-02 | 5.9E-03 | 9.3E-01 | 4.6E-01 |
| 259875_s_at | AT1G76690;AT | [AT1G76690, 12-oxophytodienoate reduct         | 7692.3 | 7248.5 | 5643.9 | 15527.4 | 7340.2 | 5350.0 | 2.9 | 2.4E-05 | 1.1E-02 | 2.1E-03 | 5.9E-03 | 4.5E-02 | 2.7E-01 |
| 255538_at   | AT4G01680    | myb family transcription factor (MYB55)        | 3.9    | 9.5    | 18.8   | 3.5     | 3.6    | 25.6   | 7.3 | 2.4E-05 | 2.2E-01 | 5.5E-02 | 6.0E-03 | 4.4E-01 | 3.2E-01 |
| 245761_at   | AT1G66890    | expressed protein                              | 62.0   | 68.9   | 95.5   | 6.7     | 16.2   | 47.3   | 7.0 | 2.5E-05 | 8.7E-08 | 1.5E-03 | 6.1E-03 | 7.3E-06 | 2.3E-01 |
| 267028_at   | AT2G38470    | WRKY family transcription factor, contains     | 813.7  | 152.6  | 402.9  | 2218.6  | 951.7  | 1661.1 | 5.3 | 2.6E-05 | 2.4E-07 | 8.4E-02 | 6.1E-03 | 1.4E-05 | 3.5E-01 |
| 252387_at   | AT3G47800    | aldose 1-epimerase family protein, similar     | 311.6  | 361.4  | 341.5  | 92.2    | 42.7   | 163.1  | 3.8 | 2.7E-05 | 1.6E-10 | 9.7E-06 | 6.2E-03 | 9.6E-08 | 1.7E-02 |
| 245662_at   | AT1G28190    | expressed protein                              | 85.7   | 20.1   | 30.7   | 147.6   | 52.3   | 89.7   | 4.3 | 2.7E-05 | 3.7E-05 | 2.8E-01 | 6.2E-03 | 5.5E-04 | 5.8E-01 |
| 266447_at   | AT2G43290    | calmodulin-like protein (MSS3), identical to   | 573.3  | 875.5  | 707.7  | 1178.0  | 2430.4 | 814.1  | 3.0 | 2.8E-05 | 3.2E-06 | 1.8E-03 | 6.2E-03 | 9.0E-05 | 2.5E-01 |
| 260602_at   | AT1G55920    | serine O-acetyltransferase, putative, identi   | 4391.7 | 2083.1 | 2004.0 | 7783.5  | 3621.3 | 3600.1 | 2.2 | 2.9E-05 | 6.8E-05 | 9.9E-01 | 6.4E-03 | 8.6E-04 | 1.0E+00 |
| 266124_at   | AT2G45080    | cyclin family protein, similar to cyclin 2 (Tr | 5.3    | 5.8    | 6.9    | 8.0     | 20.9   | 77.8   | 9.7 | 3.4E-05 | 4.3E-07 | 3.0E-04 | 7.2E-03 | 2.2E-05 | 1.0E-01 |
| 259783_at   | AT1G29510    | auxin-responsive protein, putative, similar    | 730.1  | 966.4  | 742.3  | 639.6   | 885.4  | 319.6  | 2.8 | 3.4E-05 | 3.1E-04 | 1.4E-03 | 7.2E-03 | 2.7E-03 | 2.1E-01 |
| 259982_at   | AT1G76410    | zinc finger (C3HC4-type RING finger) fami      | 12.5   | 36.9   | 23.0   | 7.0     | 18.4   | 42.9   | 6.2 | 3.5E-05 | 1.6E-01 | 4.9E-03 | 7.2E-03 | 3.5E-01 | 4.0E-01 |
| 264900_at   | AT1G23080    | auxin efflux carrier protein, putative, simila | 1161.1 | 1277.6 | 1438.8 | 299.6   | 440.2  | 919.5  | 3.1 | 3.7E-05 | 2.6E-08 | 1.1E-03 | 7.5E-03 | 3.1E-06 | 2.0E-01 |
| 249752_at   | AT5G24660    | expressed protein                              | 16.3   | 8.9    | 6.7    | 35.3    | 22.1   | 9.8    | 3.6 | 3.7E-05 | 1.0E-04 | 2.2E-01 | 7.6E-03 | 1.2E-03 | 5.1E-01 |
| 263126_at   | AT1G78460    | SOUL heme-binding family protein, weak s       | 1524.3 | 1322.1 | 1502.6 | 2609.5  | 1559.8 | 1045.7 | 2.5 | 3.8E-05 | 5.5E-02 | 6.4E-05 | 7.6E-03 | 1.5E-01 | 4.2E-02 |
| 247601_at   | AT5G60850    | Dof-type zinc finger domain-containing pro     | 261.0  | 558.6  | 512.7  | 251.9   | 428.8  | 391.3  | 2.1 | 3.9E-05 | 3.2E-02 | 4.1E-01 | 7.6E-03 | 1.0E-01 | 6.8E-01 |
| 249435_at   | AT5G39970    | expressed protein, low similarity to up-regu   | 11.7   | 8.9    | 8.2    | 23.4    | 8.7    | 8.8    | 2.7 | 3.9E-05 | 1.2E-02 | 8.7E-03 | 7.6E-03 | 4.6E-02 | 4.4E-01 |
| 261203_at   | AT1G12845    | expressed protein                              | 80.1   | 136.0  | 133.2  | 27.8    | 161.6  | 75.5   | 5.8 | 4.1E-05 | 3.0E-03 | 7.8E-03 | 7.6E-03 | 1.6E-02 | 4.4E-01 |
| 252501_at   | AT3G46880    | expressed protein, ; expression supportec      | 39.2   | 22.0   | 26.2   | 88.4    | 35.0   | 58.7   | 2.5 | 4.0E-05 | 2.9E-06 | 2.0E-01 | 7.7E-03 | 8.4E-05 | 4.9E-01 |

|             |              |                                               |        |        |        |        |        |        |     |         |         |         |         |         |         |
|-------------|--------------|-----------------------------------------------|--------|--------|--------|--------|--------|--------|-----|---------|---------|---------|---------|---------|---------|
| 253737_at   | AT4G28703    | expressed protein                             | 53.4   | 23.2   | 27.3   | 290.0  | 42.0   | 47.2   | 6.9 | 4.0E-05 | 1.3E-04 | 2.9E-02 | 7.7E-03 | 1.4E-03 | 3.6E-01 |
| 262050_at   | AT1G80130    | expressed protein                             | 117.8  | 136.9  | 131.2  | 109.7  | 223.8  | 626.8  | 5.7 | 4.1E-05 | 3.7E-05 | 1.2E-04 | 7.7E-03 | 5.5E-04 | 5.9E-02 |
| 247444_at   | AT5G62630    | expressed protein                             | 158.4  | 123.6  | 97.9   | 216.4  | 119.7  | 94.9   | 2.3 | 4.4E-05 | 2.9E-01 | 1.4E-01 | 8.1E-03 | 5.4E-01 | 4.2E-01 |
| 257066_at   | AT3G18280    | protease inhibitor/seed storage/lipid transf  | 689.7  | 714.5  | 672.2  | 294.7  | 704.0  | 761.7  | 2.6 | 4.7E-05 | 1.5E-03 | 4.8E-05 | 8.6E-03 | 9.0E-03 | 3.5E-02 |
| 263325_at   | AT2G04240    | zinc finger (C3HC4-type RING finger) fami     | 256.4  | 482.6  | 331.7  | 413.8  | 675.6  | 240.8  | 2.8 | 4.9E-05 | 7.7E-02 | 5.4E-03 | 8.9E-03 | 2.0E-01 | 4.1E-01 |
| 258432_at   | AT3G16570    | rapid alkalization factor (RALF) family pr    | 500.0  | 813.7  | 926.1  | 273.7  | 650.4  | 749.9  | 2.7 | 4.9E-05 | 4.7E-03 | 2.3E-01 | 8.9E-03 | 2.2E-02 | 5.3E-01 |
| 249947_at   | AT5G19200    | short-chain dehydrogenase/reductase (SD       | 24.3   | 29.5   | 24.2   | 29.1   | 64.7   | 26.2   | 2.5 | 5.1E-05 | 3.2E-04 | 2.8E-03 | 9.1E-03 | 2.8E-03 | 3.1E-01 |
| 255502_at   | AT4G02410    | lectin protein kinase family protein, contair | 359.4  | 91.3   | 138.5  | 819.3  | 311.8  | 528.1  | 3.9 | 5.2E-05 | 2.4E-06 | 3.0E-01 | 9.2E-03 | 7.5E-05 | 5.9E-01 |
| 255037_at   | AT4G09460    | myb family transcription factor               | 255.5  | 221.4  | 170.0  | 555.2  | 468.6  | 169.7  | 3.3 | 5.3E-05 | 2.2E-04 | 1.0E-02 | 9.4E-03 | 2.1E-03 | 4.5E-01 |
| 246926_at   | AT5G25240    | expressed protein                             | 87.2   | 142.1  | 117.5  | 136.1  | 232.1  | 63.0   | 3.7 | 5.5E-05 | 2.6E-01 | 3.2E-04 | 9.6E-03 | 5.1E-01 | 1.0E-01 |
| 264279_s_at | AT1G78820;AT | [AT1G78820, curculin-like (mannose-bindi      | 9365.4 | 6448.4 | 7347.6 | 8832.3 | 4145.8 | 4795.5 | 2.1 | 5.6E-05 | 7.1E-04 | 7.0E-02 | 9.8E-03 | 5.1E-03 | 3.3E-01 |
| 259364_at   | AT1G13260    | DNA-binding protein RAV1 (RAV1), identic      | 321.1  | 600.7  | 988.7  | 667.1  | 979.5  | 1454.9 | 3.1 | 5.9E-05 | 4.3E-04 | 4.5E-01 | 1.0E-02 | 3.5E-03 | 7.1E-01 |
| 245041_at   | AT2G26530    | expressed protein                             | 204.1  | 66.9   | 164.1  | 783.0  | 340.7  | 394.1  | 3.0 | 5.8E-05 | 9.6E-08 | 5.5E-02 | 1.0E-02 | 7.7E-06 | 3.2E-01 |
| 245176_at   | AT2G47440    | DNAJ heat shock N-terminal domain-cont        | 1629.1 | 2004.7 | 1527.0 | 2296.5 | 3108.0 | 1396.6 | 2.2 | 6.2E-05 | 3.2E-03 | 1.1E-02 | 1.0E-02 | 1.7E-02 | 4.6E-01 |
| 254292_at   | AT4G23030    | MATE efflux protein-related, contains Pfan    | 22.4   | 19.1   | 14.0   | 106.3  | 44.6   | 20.3   | 5.2 | 6.1E-05 | 8.2E-06 | 7.3E-03 | 1.0E-02 | 1.8E-04 | 4.5E-01 |
| 258537_at   | AT3G04210    | disease resistance protein (TIR-NBS class     | 118.3  | 48.1   | 54.3   | 231.5  | 73.5   | 73.1   | 3.2 | 6.4E-05 | 5.0E-03 | 5.4E-01 | 1.0E-02 | 2.3E-02 | 7.7E-01 |
| 251832_at   | AT3G55150    | exocyst subunit EXO70 family protein, cor     | 20.8   | 4.6    | 6.1    | 23.8   | 6.3    | 50.0   | 7.9 | 6.9E-05 | 4.7E-04 | 1.3E-03 | 1.1E-02 | 3.8E-03 | 2.1E-01 |
| 245369_at   | AT4G15975    | zinc finger (C3HC4-type RING finger) fami     | 65.3   | 30.9   | 28.0   | 210.3  | 67.3   | 64.1   | 3.3 | 6.8E-05 | 1.7E-05 | 4.6E-01 | 1.1E-02 | 3.1E-04 | 7.1E-01 |
| 267238_at   | AT2G44130    | kelch repeat-containing F-box family prote    | 14.9   | 21.4   | 13.2   | 181.2  | 147.8  | 23.5   | 7.7 | 6.7E-05 | 1.5E-07 | 8.1E-04 | 1.1E-02 | 1.0E-05 | 1.7E-01 |
| 251827_at   | AT3G55120    | chalcone-flavanone isomerase / chalcone       | 455.2  | 476.9  | 485.4  | 238.2  | 411.9  | 603.0  | 2.5 | 7.2E-05 | 7.2E-03 | 2.6E-04 | 1.1E-02 | 3.1E-02 | 9.3E-02 |
| 253351_at   | AT4G33700    | CBS domain-containing protein, contains I     | 107.8  | 119.6  | 148.0  | 44.7   | 59.7   | 117.4  | 2.6 | 7.3E-05 | 5.8E-06 | 1.5E-02 | 1.1E-02 | 1.4E-04 | 4.6E-01 |
| 249494_at   | AT5G39050    | transferase family protein, similar to antho  | 494.5  | 450.3  | 332.6  | 1795.4 | 605.7  | 982.7  | 3.0 | 7.5E-05 | 6.5E-08 | 4.4E-04 | 1.1E-02 | 5.9E-06 | 1.2E-01 |
| 252890_at   | AT4G39400    | brassinosteroid insensitive 1 (BRI1), identi  | 1443.1 | 1962.7 | 2045.6 | 841.2  | 1030.7 | 1817.5 | 2.2 | 7.7E-05 | 3.2E-05 | 1.8E-02 | 1.2E-02 | 4.9E-04 | 4.5E-01 |
| 257766_at   | AT3G23030    | auxin-responsive protein / indoleacetic aci   | 2550.6 | 3020.2 | 4608.2 | 866.9  | 1379.2 | 3499.4 | 4.0 | 8.1E-05 | 8.3E-05 | 5.7E-02 | 1.2E-02 | 9.9E-04 | 3.2E-01 |
| 256762_at   | AT3G25655    | expressed protein                             | 5.1    | 5.0    | 5.1    | 10.8   | 8.1    | 69.9   | 8.6 | 8.3E-05 | 1.1E-06 | 9.4E-05 | 1.2E-02 | 4.3E-05 | 5.4E-02 |
| 248191_at   | AT5G54130    | calcium-binding EF hand family protein, cc    | 112.4  | 137.4  | 133.4  | 60.2   | 172.9  | 196.4  | 3.3 | 8.4E-05 | 9.8E-01 | 1.5E-03 | 1.2E-02 | 9.9E-01 | 2.2E-01 |
| 248801_at   | AT5G47370    | homeobox-leucine zipper protein 2 (HAT2)      | 917.4  | 1693.4 | 1803.3 | 339.2  | 688.6  | 790.0  | 2.3 | 8.9E-05 | 1.1E-06 | 7.9E-01 | 1.3E-02 | 4.3E-05 | 9.1E-01 |
| 258651_at   | AT3G09920    | phosphatidylinositol-4-phosphate 5-kinase     | 88.1   | 53.0   | 56.5   | 73.1   | 29.1   | 68.4   | 2.5 | 8.9E-05 | 4.4E-02 | 1.1E-02 | 1.3E-02 | 1.3E-01 | 4.6E-01 |
| 248164_at   | AT5G54490    | calcium-binding EF-hand protein, putative,    | 23.1   | 11.6   | 31.8   | 721.8  | 413.1  | 235.8  | 3.1 | 1.1E-04 | 6.8E-14 | 4.5E-06 | 1.4E-02 | 7.8E-10 | 1.3E-02 |
| 246781_at   | AT5G27350    | sugar-porter family protein 1 (SFP1), ident   | 598.0  | 619.4  | 557.5  | 693.5  | 907.6  | 444.9  | 2.0 | 9.3E-05 | 6.8E-02 | 1.3E-03 | 1.3E-02 | 1.8E-01 | 2.1E-01 |
| 253617_at   | AT4G30410    | expressed protein, similar to cDNA bHLH f     | 28.1   | 29.3   | 30.1   | 25.1   | 25.0   | 55.9   | 2.2 | 9.4E-05 | 7.7E-02 | 2.7E-04 | 1.3E-02 | 2.0E-01 | 9.3E-02 |
| 257855_at   | AT3G13040    | myb family transcription factor, contains P   | 392.1  | 355.4  | 421.6  | 196.7  | 221.9  | 412.2  | 2.1 | 9.4E-05 | 1.5E-05 | 1.4E-03 | 1.3E-02 | 2.9E-04 | 2.1E-01 |
| 255403_at   | AT4G03400    | auxin-responsive GH3 family protein, simil    | 322.4  | 446.6  | 261.4  | 207.6  | 338.1  | 160.7  | 2.1 | 1.0E-04 | 3.1E-04 | 5.6E-01 | 1.4E-02 | 2.7E-03 | 7.8E-01 |
| 249467_at   | AT5G39610    | no apical meristem (NAM) family protein, c    | 24.3   | 21.9   | 33.6   | 12.6   | 8.1    | 36.4   | 4.5 | 1.1E-04 | 1.2E-03 | 1.2E-02 | 1.4E-02 | 7.6E-03 | 4.6E-01 |
| 262531_at   | AT1G17230    | leucine-rich repeat family protein / protein  | 297.6  | 293.1  | 272.4  | 81.4   | 138.5  | 367.0  | 4.5 | 1.1E-04 | 2.9E-05 | 3.4E-05 | 1.4E-02 | 4.6E-04 | 3.0E-02 |
| 253247_at   | AT4G34610    | homeodomain-containing protein, similarit     | 265.8  | 223.3  | 260.0  | 115.8  | 104.0  | 279.8  | 2.7 | 1.1E-04 | 1.9E-05 | 5.0E-04 | 1.5E-02 | 3.3E-04 | 1.2E-01 |

|           |              |                                              |        |        |        |        |        |        |      |         |         |         |         |         |         |
|-----------|--------------|----------------------------------------------|--------|--------|--------|--------|--------|--------|------|---------|---------|---------|---------|---------|---------|
| 257746_at | AT3G29200    | chorismate mutase, chloroplast (CM1), ide    | 302.0  | 321.1  | 362.1  | 230.4  | 309.9  | 470.6  | 2.0  | 1.1E-04 | 8.0E-01 | 7.9E-03 | 1.5E-02 | 9.2E-01 | 4.4E-01 |
| 249558_at | AT5G38310    | expressed protein                            | 4.4    | 4.3    | 4.4    | 9.3    | 4.6    | 4.9    | 2.0  | 1.2E-04 | 5.3E-05 | 1.7E-04 | 1.5E-02 | 7.1E-04 | 7.8E-02 |
| 255895_at | AT1G18020;AT | [AT1G18020, 12-oxophytodienoate reduct       | 306.2  | 186.6  | 234.5  | 336.8  | 95.0   | 189.5  | 3.5  | 1.2E-04 | 3.5E-02 | 4.5E-02 | 1.5E-02 | 1.1E-01 | 3.2E-01 |
| 252965_at | AT4G38860    | auxin-responsive protein, putative, auxin-ir | 366.0  | 641.5  | 465.7  | 882.8  | 1320.3 | 388.1  | 3.4  | 1.3E-04 | 4.6E-04 | 1.9E-03 | 1.6E-02 | 3.7E-03 | 2.5E-01 |
| 260034_at | AT1G68810    | basic helix-loop-helix (bHLH) family proteir | 170.3  | 234.7  | 212.2  | 58.0   | 117.3  | 140.8  | 2.4  | 1.4E-04 | 8.7E-07 | 1.6E-02 | 1.7E-02 | 3.6E-05 | 4.6E-01 |
| 255933_at | AT1G12750    | rhomboid family protein, contains PFAM d     | 430.2  | 339.4  | 294.8  | 500.9  | 246.1  | 313.7  | 2.0  | 1.4E-04 | 6.0E-01 | 3.0E-02 | 1.7E-02 | 8.3E-01 | 3.5E-01 |
| 247077_at | AT5G66420    | expressed protein                            | 184.7  | 208.9  | 200.9  | 75.8   | 76.9   | 179.4  | 2.4  | 1.4E-04 | 2.9E-07 | 2.4E-04 | 1.7E-02 | 1.7E-05 | 9.0E-02 |
| 264056_at | AT2G28510    | Dof-type zinc finger domain-containing prc   | 340.4  | 249.9  | 266.6  | 305.0  | 132.1  | 257.0  | 2.3  | 1.4E-04 | 4.3E-03 | 1.3E-02 | 1.7E-02 | 2.1E-02 | 4.6E-01 |
| 259864_at | AT1G72800    | nuM1-related, contains similarity with nuM   | 243.7  | 230.0  | 212.3  | 487.0  | 645.9  | 226.9  | 2.8  | 1.5E-04 | 5.1E-06 | 8.3E-04 | 1.8E-02 | 1.2E-04 | 1.7E-01 |
| 247774_at | AT5G58660    | oxidoreductase, 2OG-Fe(II) oxygenase far     | 25.2   | 28.2   | 30.1   | 10.3   | 28.7   | 106.4  | 10.3 | 1.5E-04 | 4.4E-01 | 5.6E-04 | 1.8E-02 | 7.1E-01 | 1.3E-01 |
| 262500_at | AT1G21760    | F-box family protein, Contains PF:00646 F    | 317.0  | 426.3  | 419.5  | 152.6  | 201.0  | 333.4  | 2.2  | 1.5E-04 | 2.5E-06 | 1.4E-02 | 1.8E-02 | 7.7E-05 | 4.7E-01 |
| 259373_at | AT1G69160    | expressed protein                            | 184.2  | 288.4  | 273.1  | 34.9   | 62.2   | 105.0  | 3.0  | 1.5E-04 | 8.7E-09 | 2.9E-02 | 1.8E-02 | 1.5E-06 | 3.7E-01 |
| 258282_at | AT3G26910    | hydroxyproline-rich glycoprotein family pro  | 299.4  | 129.9  | 120.2  | 711.0  | 230.7  | 385.1  | 3.1  | 1.6E-04 | 2.9E-05 | 2.4E-01 | 1.8E-02 | 4.6E-04 | 5.3E-01 |
| 252296_at | AT3G48970    | copper-binding family protein, similar to cc | 53.8   | 131.3  | 135.9  | 77.7   | 121.9  | 206.0  | 2.7  | 1.7E-04 | 8.8E-02 | 2.6E-01 | 1.9E-02 | 2.2E-01 | 5.6E-01 |
| 261265_at | AT1G26800    | zinc finger (C3HC4-type RING finger) fami    | 15.2   | 21.4   | 14.2   | 54.4   | 75.5   | 12.4   | 6.1  | 1.7E-04 | 1.6E-04 | 2.9E-03 | 1.9E-02 | 1.7E-03 | 3.2E-01 |
| 261700_at | AT1G32690    | expressed protein, similar to hypothetical p | 28.6   | 68.8   | 74.8   | 15.9   | 29.8   | 61.8   | 3.9  | 1.6E-04 | 4.4E-03 | 2.6E-01 | 1.9E-02 | 2.1E-02 | 5.6E-01 |
| 248686_at | AT5G48540    | 33 kDa secretory protein-related, contains   | 1071.5 | 442.5  | 438.0  | 1775.8 | 484.1  | 875.7  | 3.7  | 1.6E-04 | 1.3E-02 | 2.7E-01 | 1.9E-02 | 5.0E-02 | 5.6E-01 |
| 264091_at | AT1G79110    | expressed protein                            | 98.2   | 162.7  | 149.3  | 44.7   | 76.7   | 99.8   | 2.2  | 1.7E-04 | 7.4E-06 | 1.8E-01 | 1.9E-02 | 1.6E-04 | 4.6E-01 |
| 250004_at | AT5G18750    | DNAJ heat shock N-terminal domain-conta      | 125.0  | 67.6   | 65.6   | 113.3  | 50.6   | 90.1   | 2.2  | 1.8E-04 | 8.1E-01 | 5.8E-02 | 2.0E-02 | 9.3E-01 | 3.2E-01 |
| 247543_at | AT5G61600    | encodes a member of the ERF (ethylene r      | 289.5  | 254.7  | 549.9  | 1458.0 | 1471.8 | 715.7  | 2.2  | 8.5E-01 | 6.3E-09 | 1.6E-05 | 9.1E-01 | 1.2E-06 | 2.0E-02 |
| 261648_at | AT1G27730    | zinc finger (C2H2 type) family protein (ZA   | 352.5  | 113.3  | 634.3  | 2304.8 | 1544.1 | 2179.9 | 5.6  | 1.8E-04 | 1.3E-08 | 6.5E-03 | 2.0E-02 | 2.0E-06 | 4.5E-01 |
| 253414_at | AT4G33050    | calmodulin-binding family protein, contain   | 3322.6 | 1389.1 | 1397.5 | 5818.0 | 2105.1 | 3693.3 | 2.8  | 1.9E-04 | 2.7E-04 | 2.2E-01 | 2.0E-02 | 2.5E-03 | 5.2E-01 |
| 260655_at | AT1G19320    | pathogenesis-related thaumatin family pro    | 70.8   | 109.9  | 136.1  | 17.5   | 13.5   | 35.0   | 2.6  | 1.9E-04 | 1.1E-09 | 1.4E-02 | 2.0E-02 | 3.7E-07 | 4.7E-01 |
| 256453_at | AT1G75270    | dehydroascorbate reductase, putative, sirr   | 805.4  | 882.3  | 693.4  | 2327.6 | 1473.7 | 888.3  | 2.6  | 1.8E-04 | 3.2E-06 | 2.5E-03 | 2.0E-02 | 9.1E-05 | 3.0E-01 |
| 250752_at | AT5G05690    | cytochrome P450 90A1 (CYP90A1) (CYP          | 1587.8 | 2328.1 | 2502.8 | 278.1  | 386.3  | 953.2  | 3.4  | 1.9E-04 | 1.4E-08 | 1.8E-02 | 2.1E-02 | 2.1E-06 | 4.5E-01 |
| 257805_at | AT3G18830    | This gene encodes a plasma membrane-l        | 2097.8 | 1424.2 | 1279.0 | 3108.0 | 1358.3 | 1195.1 | 2.6  | 2.0E-04 | 3.9E-01 | 1.6E-01 | 2.1E-02 | 6.5E-01 | 4.5E-01 |
| 255941_at | AT1G20350    | mitochondrial import inner membrane tran     | 3.8    | 3.8    | 3.8    | 10.9   | 4.4    | 4.1    | 2.7  | 2.0E-04 | 7.9E-05 | 2.4E-04 | 2.1E-02 | 9.6E-04 | 8.9E-02 |
| 256337_at | AT1G72060    | expressed protein                            | 96.8   | 42.5   | 44.2   | 453.5  | 69.5   | 76.0   | 6.5  | 2.1E-04 | 1.2E-03 | 9.9E-02 | 2.2E-02 | 7.6E-03 | 3.7E-01 |
| 248732_at | AT5G48070    | putative xyloglucan endotransglycosylase/    | 28.5   | 21.5   | 19.3   | 163.5  | 55.7   | 45.0   | 3.6  | 2.1E-04 | 4.0E-07 | 1.9E-02 | 2.2E-02 | 2.1E-05 | 4.4E-01 |
| 256960_at | AT3G13510    | expressed protein, Pfam profile PF03080:     | 202.2  | 252.2  | 237.3  | 80.6   | 159.2  | 192.6  | 2.4  | 2.1E-04 | 1.3E-05 | 7.1E-03 | 2.2E-02 | 2.5E-04 | 4.4E-01 |
| 252047_at | AT3G52490    | heat shock protein-related, contains simila  | 16.2   | 12.9   | 13.9   | 33.3   | 15.0   | 13.8   | 2.4  | 2.1E-04 | 3.5E-03 | 7.4E-03 | 2.2E-02 | 1.8E-02 | 4.5E-01 |
| 246584_at | AT5G14730    | expressed protein                            | 175.3  | 141.3  | 120.0  | 2339.5 | 1472.9 | 597.6  | 3.9  | 2.1E-04 | 3.3E-10 | 1.3E-02 | 2.2E-02 | 1.7E-07 | 4.6E-01 |
| 248190_at | AT5G54120    | expressed protein                            | 65.1   | 82.4   | 79.2   | 42.7   | 104.5  | 111.7  | 2.6  | 2.2E-04 | 5.6E-01 | 8.5E-03 | 2.2E-02 | 8.0E-01 | 4.4E-01 |
| 245543_at | AT4G15260    | UDP-glucuronosyl/UDP-glucosyl transfera      | 290.2  | 207.2  | 205.8  | 229.6  | 100.7  | 150.6  | 2.3  | 2.2E-04 | 1.8E-04 | 6.0E-02 | 2.2E-02 | 1.8E-03 | 3.2E-01 |
| 265511_at | AT2G05540    | glycine-rich protein                         | 1428.3 | 1849.2 | 2008.9 | 928.5  | 799.6  | 1722.2 | 2.2  | 2.2E-04 | 2.2E-05 | 6.5E-03 | 2.2E-02 | 3.7E-04 | 4.5E-01 |
| 265806_at | AT2G18010    | auxin-responsive family protein, similar to  | 81.4   | 96.6   | 60.5   | 93.2   | 216.3  | 23.7   | 9.1  | 2.2E-04 | 9.9E-01 | 6.9E-03 | 2.2E-02 | 1.0E+00 | 4.4E-01 |

|           |           |                                               |        |        |        |        |        |        |     |         |         |         |         |         |         |
|-----------|-----------|-----------------------------------------------|--------|--------|--------|--------|--------|--------|-----|---------|---------|---------|---------|---------|---------|
| 255926_at | AT1G22190 | AP2 domain-containing transcription facto     | 97.7   | 181.5  | 218.5  | 163.9  | 291.3  | 327.2  | 2.2 | 2.3E-04 | 9.6E-04 | 9.1E-01 | 2.3E-02 | 6.5E-03 | 9.6E-01 |
| 262653_at | AT1G14130 | 2-oxoglutarate-dependent dioxygenase, pt      | 72.7   | 82.9   | 65.8   | 177.0  | 93.7   | 71.6   | 2.5 | 2.4E-04 | 1.7E-04 | 5.7E-04 | 2.3E-02 | 1.7E-03 | 1.3E-01 |
| 247074_at | AT5G66590 | allergen V5/Tpx-1-related family protein, c   | 88.1   | 200.1  | 165.5  | 53.0   | 100.0  | 171.4  | 3.2 | 2.8E-04 | 1.2E-02 | 1.0E-01 | 2.6E-02 | 4.7E-02 | 3.7E-01 |
| 252646_at | AT3G44610 | protein kinase family protein, similar to vir | 25.0   | 31.5   | 30.1   | 12.3   | 33.2   | 32.2   | 2.7 | 2.9E-04 | 6.1E-02 | 8.4E-03 | 2.7E-02 | 1.7E-01 | 4.5E-01 |
| 245479_at | AT4G16140 | proline-rich family protein, contains proline | 478.5  | 667.7  | 556.9  | 266.0  | 537.0  | 400.4  | 2.0 | 2.9E-04 | 2.0E-04 | 1.4E-01 | 2.7E-02 | 1.9E-03 | 4.2E-01 |
| 261597_at | AT1G49780 | U-box domain-containing protein, similar to   | 27.2   | 20.4   | 38.6   | 16.7   | 8.2    | 29.7   | 3.6 | 3.0E-04 | 1.4E-03 | 1.7E-01 | 2.7E-02 | 8.5E-03 | 4.6E-01 |
| 245051_at | AT2G23320 | WRKY family transcription factor, identical   | 935.6  | 569.3  | 665.5  | 1470.4 | 624.5  | 1239.5 | 2.4 | 2.9E-04 | 1.5E-03 | 1.1E-01 | 2.7E-02 | 8.9E-03 | 3.8E-01 |
| 247933_at | AT5G56980 | expressed protein, non-consensus CG do        | 18.6   | 32.7   | 43.6   | 9.9    | 9.1    | 44.8   | 4.9 | 3.0E-04 | 3.6E-03 | 3.1E-02 | 2.7E-02 | 1.8E-02 | 3.5E-01 |
| 260434_at | AT1G68330 | expressed protein                             | 46.0   | 23.5   | 26.1   | 81.2   | 50.9   | 29.2   | 2.8 | 3.0E-04 | 1.1E-03 | 9.1E-02 | 2.7E-02 | 7.2E-03 | 3.6E-01 |
| 247478_at | AT5G62360 | invertase/pectin methylesterase inhibitor f   | 1696.3 | 2986.0 | 3236.8 | 139.4  | 252.7  | 558.5  | 4.0 | 3.0E-04 | 2.2E-09 | 9.3E-02 | 2.7E-02 | 6.0E-07 | 3.6E-01 |
| 253044_at | AT4G37290 | expressed protein                             | 5.0    | 4.7    | 5.2    | 69.0   | 11.4   | 28.2   | 6.1 | 3.0E-04 | 1.4E-08 | 5.0E-04 | 2.7E-02 | 2.1E-06 | 1.2E-01 |
| 267614_at | AT2G26710 | Encodes a member of the cytochrome p4f        | 41.1   | 88.4   | 56.8   | 102.8  | 246.4  | 45.4   | 5.4 | 3.0E-04 | 3.1E-03 | 1.2E-02 | 2.7E-02 | 1.6E-02 | 4.6E-01 |
| 261023_at | AT1G12200 | flavin-containing monooxygenase family p      | 570.3  | 441.0  | 395.7  | 764.4  | 485.7  | 346.8  | 2.2 | 3.2E-04 | 3.1E-01 | 1.5E-01 | 2.8E-02 | 5.7E-01 | 4.3E-01 |
| 253062_at | AT4G37590 | phototropic-responsive NPH3 family protei     | 352.7  | 305.6  | 339.6  | 112.2  | 136.8  | 258.6  | 2.3 | 3.3E-04 | 5.8E-08 | 3.7E-04 | 2.9E-02 | 5.4E-06 | 1.1E-01 |
| 252173_at | AT3G50650 | scarecrow-like transcription factor 7 (SCL7   | 288.7  | 223.0  | 191.3  | 481.0  | 353.1  | 193.8  | 2.5 | 3.3E-04 | 4.3E-03 | 9.6E-02 | 2.9E-02 | 2.1E-02 | 3.6E-01 |
| 259773_at | AT1G29500 | auxin-responsive protein, putative, similar   | 675.3  | 863.6  | 682.8  | 498.8  | 783.1  | 306.3  | 2.6 | 3.4E-04 | 4.3E-04 | 1.4E-02 | 2.9E-02 | 3.5E-03 | 4.7E-01 |
| 254809_at | AT4G12410 | auxin-responsive family protein, similar to   | 15.2   | 23.7   | 23.1   | 13.5   | 19.0   | 43.0   | 3.2 | 3.4E-04 | 4.1E-01 | 1.9E-02 | 3.0E-02 | 6.8E-01 | 4.4E-01 |
| 246993_at | AT5G67450 | zinc finger (C2H2 type) protein 1 (AZF1), i   | 516.7  | 149.7  | 83.7   | 557.1  | 271.0  | 305.4  | 6.2 | 3.6E-04 | 3.7E-03 | 5.4E-02 | 3.0E-02 | 1.9E-02 | 3.2E-01 |
| 259784_at | AT1G29450 | auxin-responsive protein, putative, similar   | 280.5  | 370.0  | 278.8  | 224.9  | 365.9  | 136.5  | 2.7 | 3.6E-04 | 4.6E-03 | 2.3E-02 | 3.0E-02 | 2.2E-02 | 4.0E-01 |
| 253629_at | AT4G30450 | glycine-rich protein                          | 22.3   | 23.3   | 26.4   | 16.6   | 25.1   | 42.9   | 2.6 | 3.6E-04 | 2.8E-01 | 6.4E-03 | 3.0E-02 | 5.3E-01 | 4.4E-01 |
| 245276_at | AT4G16780 | homeobox-leucine zipper protein 4 (HAT4)      | 26.4   | 30.5   | 49.2   | 20.6   | 25.1   | 49.3   | 2.4 | 3.6E-04 | 2.1E-01 | 6.4E-01 | 3.0E-02 | 4.3E-01 | 8.2E-01 |
| 258021_at | AT3G19380 | U-box domain-containing protein, contains     | 18.3   | 18.9   | 27.1   | 12.3   | 7.0    | 25.6   | 3.7 | 3.7E-04 | 1.7E-03 | 2.4E-02 | 3.0E-02 | 1.0E-02 | 4.0E-01 |
| 250493_at | AT5G09800 | U-box domain-containing protein, low simil    | 49.4   | 37.8   | 47.5   | 131.1  | 48.4   | 163.0  | 3.4 | 3.7E-04 | 9.7E-06 | 1.0E-02 | 3.0E-02 | 2.0E-04 | 4.5E-01 |
| 259751_at | AT1G71030 | Encodes a putative myb family transcrip       | 242.6  | 219.1  | 262.4  | 29.9   | 8.2    | 65.1   | 8.0 | 3.7E-04 | 9.2E-09 | 1.6E-03 | 3.0E-02 | 1.6E-06 | 2.3E-01 |
| 267515_at | AT2G45680 | TCP family transcription factor, putative, s  | 158.6  | 287.3  | 316.2  | 99.7   | 176.8  | 215.3  | 2.2 | 3.8E-04 | 1.7E-03 | 9.3E-01 | 3.1E-02 | 9.9E-03 | 9.7E-01 |
| 259683_at | AT1G63050 | membrane bound O-acyl transferase (MB         | 141.1  | 185.9  | 189.1  | 33.4   | 48.5   | 121.8  | 3.6 | 3.8E-04 | 6.9E-07 | 6.8E-03 | 3.1E-02 | 3.0E-05 | 4.4E-01 |
| 266908_at | AT2G34650 | protein kinase PINOID (PID), identical to p   | 32.8   | 48.6   | 31.5   | 114.0  | 147.6  | 45.2   | 3.3 | 4.0E-04 | 5.3E-06 | 2.0E-02 | 3.1E-02 | 1.3E-04 | 4.3E-01 |
| 253999_at | AT4G26200 | 1-aminocyclopropane-1-carboxylate synth       | 220.0  | 57.8   | 198.3  | 394.2  | 184.8  | 1652.1 | 8.9 | 4.0E-04 | 2.3E-04 | 7.4E-02 | 3.1E-02 | 2.1E-03 | 3.4E-01 |
| 261768_at | AT1G15550 | gibberellin 3-beta-dioxygenase / gibberellir  | 142.4  | 207.2  | 159.6  | 84.5   | 188.2  | 98.5   | 2.2 | 4.1E-04 | 1.4E-03 | 1.4E-01 | 3.1E-02 | 8.6E-03 | 4.2E-01 |
| 256818_at | AT3G21420 | oxidoreductase, 2OG-Fe(II) oxygenase far      | 10.8   | 10.7   | 9.6    | 20.7   | 11.2   | 8.7    | 2.4 | 4.1E-04 | 1.9E-02 | 2.9E-03 | 3.1E-02 | 6.7E-02 | 3.2E-01 |
| 256528_at | AT1G66140 | zinc finger (C2H2 type) family protein, con   | 217.9  | 264.1  | 189.0  | 154.2  | 206.3  | 94.2   | 2.2 | 4.0E-04 | 1.8E-04 | 9.7E-02 | 3.1E-02 | 1.8E-03 | 3.7E-01 |
| 247610_at | AT5G60630 | expressed protein, predicted protein, Arab    | 13.4   | 12.7   | 13.5   | 29.5   | 15.3   | 13.4   | 2.2 | 3.9E-04 | 2.0E-04 | 5.5E-04 | 3.1E-02 | 1.9E-03 | 1.3E-01 |
| 254231_at | AT4G23810 | WRKY family transcription factor, AR411 -     | 875.7  | 107.7  | 152.0  | 620.2  | 340.7  | 620.1  | 8.1 | 4.1E-04 | 2.8E-03 | 7.2E-03 | 3.1E-02 | 1.5E-02 | 4.5E-01 |
| 250569_at | AT5G08130 | basic helix-loop-helix (bHLH) family proteir  | 264.3  | 275.2  | 348.3  | 90.5   | 104.3  | 246.9  | 2.7 | 4.0E-04 | 3.8E-06 | 2.3E-02 | 3.1E-02 | 1.0E-04 | 4.0E-01 |
| 252970_at | AT4G38850 | auxin-responsive protein / small auxin up f   | 608.3  | 867.1  | 605.3  | 974.9  | 1333.6 | 439.5  | 3.0 | 4.0E-04 | 9.2E-02 | 1.6E-02 | 3.2E-02 | 2.3E-01 | 4.5E-01 |
| 262315_at | AT1G70990 | proline-rich family protein                   | 104.1  | 97.6   | 61.4   | 408.7  | 259.1  | 116.8  | 3.5 | 4.2E-04 | 7.1E-06 | 1.2E-01 | 3.2E-02 | 1.6E-04 | 4.0E-01 |

|             |              |                                                |        |        |        |        |        |        |      |         |         |         |         |         |         |
|-------------|--------------|------------------------------------------------|--------|--------|--------|--------|--------|--------|------|---------|---------|---------|---------|---------|---------|
| 262630_at   | AT1G06520    | Encodes a membrane associated mitoch           | 43.7   | 54.7   | 34.8   | 87.0   | 118.6  | 38.2   | 3.1  | 4.2E-04 | 8.0E-04 | 7.0E-02 | 3.2E-02 | 5.6E-03 | 3.3E-01 |
| 253779_at   | AT4G28490    | leucine-rich repeat transmembrane proteir      | 281.8  | 233.8  | 234.3  | 445.9  | 151.7  | 194.1  | 2.9  | 4.3E-04 | 5.9E-01 | 7.8E-03 | 3.2E-02 | 8.2E-01 | 4.5E-01 |
| 251839_at   | AT3G54950    | patatin-related, low similarity to patatin (Gl | 21.8   | 32.3   | 37.7   | 21.5   | 19.7   | 50.2   | 2.6  | 4.3E-04 | 5.0E-01 | 3.4E-02 | 3.2E-02 | 7.5E-01 | 3.4E-01 |
| 258189_at   | AT3G17860    | expressed protein                              | 147.1  | 203.7  | 188.5  | 124.5  | 203.1  | 276.0  | 2.2  | 4.5E-04 | 4.0E-01 | 4.3E-02 | 3.3E-02 | 6.6E-01 | 3.2E-01 |
| 253736_at   | AT4G28780    | GDSL-motif lipase/hydrolase family proteir     | 134.4  | 166.9  | 133.7  | 158.9  | 289.4  | 126.4  | 2.3  | 4.6E-04 | 1.8E-02 | 2.9E-02 | 3.4E-02 | 6.5E-02 | 3.7E-01 |
| 250537_at   | AT5G08565    | expressed protein                              | 47.1   | 57.2   | 54.0   | 46.9   | 90.5   | 115.5  | 2.5  | 4.8E-04 | 3.1E-04 | 7.7E-03 | 3.4E-02 | 2.7E-03 | 4.5E-01 |
| 263150_at   | AT1G54050    | 17.4 kDa class III heat shock protein (HSF     | 50.6   | 47.8   | 43.8   | 163.3  | 204.2  | 57.1   | 3.6  | 4.8E-04 | 1.3E-06 | 2.1E-03 | 3.4E-02 | 4.9E-05 | 2.7E-01 |
| 266693_at   | AT2G19800    | expressed protein, similar to myo-inositol c   | 1217.3 | 636.1  | 530.8  | 4161.9 | 3334.9 | 1871.8 | 2.3  | 4.9E-04 | 7.7E-08 | 3.0E-01 | 3.5E-02 | 6.7E-06 | 5.9E-01 |
| 262259_s_at | AT1G53870;AT | [AT1G53870, expressed protein, contains        | 22.1   | 45.1   | 50.9   | 10.1   | 15.2   | 19.8   | 2.3  | 4.9E-04 | 3.2E-06 | 5.6E-01 | 3.5E-02 | 9.0E-05 | 7.8E-01 |
| 247625_at   | AT5G60200    | Dof-type zinc finger domain-containing prc     | 99.3   | 59.8   | 73.2   | 273.3  | 118.5  | 71.0   | 3.9  | 5.0E-04 | 1.1E-03 | 1.9E-02 | 3.5E-02 | 7.0E-03 | 4.4E-01 |
| 249765_at   | AT5G24030    | C4-dicarboxylate transporter/malic acid tra    | 1169.1 | 711.5  | 497.6  | 1740.5 | 1987.6 | 1046.3 | 2.3  | 5.0E-04 | 1.6E-05 | 8.5E-02 | 3.5E-02 | 2.9E-04 | 3.5E-01 |
| 257398_at   | AT2G01990    | expressed protein, similar to hypothetical p   | 37.1   | 17.8   | 19.6   | 56.6   | 23.4   | 22.0   | 2.6  | 5.1E-04 | 7.0E-02 | 6.7E-01 | 3.5E-02 | 1.9E-01 | 8.4E-01 |
| 251176_at   | AT3G63380    | calcium-transporting ATPase, plasma mer        | 124.0  | 127.2  | 146.2  | 106.7  | 95.2   | 1000.2 | 10.5 | 5.1E-04 | 3.6E-02 | 1.5E-03 | 3.6E-02 | 1.1E-01 | 2.2E-01 |
| 247754_at   | AT5G59080    | expressed protein                              | 25.5   | 34.5   | 55.8   | 17.5   | 23.6   | 44.2   | 2.5  | 5.2E-04 | 2.5E-02 | 8.7E-01 | 3.6E-02 | 8.3E-02 | 9.4E-01 |
| 259787_at   | AT1G29460    | auxin-responsive protein, putative, similar    | 143.4  | 235.1  | 176.1  | 156.4  | 250.7  | 69.6   | 3.6  | 5.2E-04 | 4.8E-02 | 5.9E-03 | 3.6E-02 | 1.4E-01 | 4.3E-01 |
| 258075_at   | AT3G25900    | homocysteine S-methyltransferase 1 (HM         | 166.8  | 147.7  | 126.4  | 1062.0 | 883.2  | 397.3  | 2.7  | 5.3E-04 | 1.5E-09 | 2.2E-02 | 3.6E-02 | 4.8E-07 | 4.1E-01 |
| 247940_at   | AT5G57190    | phosphatidylserine decarboxylase, putativ      | 16.0   | 12.6   | 12.1   | 32.6   | 12.3   | 20.6   | 2.6  | 5.6E-04 | 7.3E-04 | 1.6E-02 | 3.8E-02 | 5.2E-03 | 4.6E-01 |
| 249480_s_at | AT5G38990;AT | [AT5G38990, protein kinase family protein      | 183.4  | 123.0  | 130.9  | 323.4  | 114.8  | 155.5  | 2.8  | 5.7E-04 | 6.9E-02 | 1.0E-01 | 3.8E-02 | 1.8E-01 | 3.7E-01 |
| 246858_at   | AT5G25930    | leucine-rich repeat family protein / protein   | 520.3  | 192.0  | 196.3  | 733.3  | 335.8  | 530.2  | 2.7  | 5.7E-04 | 6.3E-04 | 1.9E-01 | 3.8E-02 | 4.7E-03 | 4.8E-01 |
| 246735_at   | AT5G27670    | histone H2A, putative, similar to histone H    | 849.8  | 923.8  | 1079.8 | 298.0  | 362.2  | 725.4  | 2.4  | 5.8E-04 | 1.1E-06 | 2.4E-02 | 3.9E-02 | 4.3E-05 | 3.9E-01 |
| 252178_at   | AT3G50750    | brassinosteroid signalling positive regulatc   | 44.4   | 69.7   | 70.3   | 14.2   | 15.9   | 45.9   | 3.2  | 6.0E-04 | 3.2E-06 | 1.4E-02 | 3.9E-02 | 9.1E-05 | 4.7E-01 |
| 249188_at   | AT5G42830    | transferase family protein, similar to anthr   | 7.8    | 6.6    | 7.6    | 123.6  | 28.0   | 45.2   | 4.4  | 6.0E-04 | 2.0E-09 | 3.0E-03 | 3.9E-02 | 5.6E-07 | 3.1E-01 |
| 256522_at   | AT1G66160    | U-box domain-containing protein, similar to    | 1158.7 | 627.6  | 570.6  | 1823.4 | 1169.4 | 956.4  | 2.0  | 6.0E-04 | 3.4E-04 | 8.1E-01 | 4.0E-02 | 2.9E-03 | 9.2E-01 |
| 251774_at   | AT3G55840    | expressed protein                              | 16.5   | 16.8   | 15.8   | 147.5  | 157.1  | 21.2   | 7.4  | 6.1E-04 | 1.2E-06 | 9.8E-04 | 4.0E-02 | 4.6E-05 | 1.9E-01 |
| 261292_at   | AT1G36940    | expressed protein                              | 24.2   | 47.8   | 53.4   | 9.1    | 10.8   | 28.7   | 3.1  | 6.2E-04 | 1.4E-05 | 9.0E-02 | 4.0E-02 | 2.7E-04 | 3.6E-01 |
| 262951_at   | AT1G75500    | nodulin MtN21 family protein, similar to Mt    | 2383.3 | 3220.5 | 3545.8 | 891.5  | 1363.5 | 2427.1 | 2.7  | 6.4E-04 | 1.5E-05 | 8.7E-02 | 4.1E-02 | 2.8E-04 | 3.5E-01 |
| 262072_at   | AT1G59590    | expressed protein                              | 29.0   | 13.9   | 14.6   | 578.9  | 286.9  | 278.6  | 2.1  | 6.3E-04 | 1.7E-11 | 9.7E-01 | 4.1E-02 | 1.9E-08 | 9.9E-01 |
| 248419_at   | AT5G51550    | phosphate-responsive 1 family protein, sin     | 1353.0 | 1649.3 | 1435.7 | 1906.5 | 2425.3 | 933.8  | 2.6  | 6.4E-04 | 2.6E-01 | 2.7E-03 | 4.1E-02 | 5.0E-01 | 3.1E-01 |
| 245262_at   | AT4G16563    | aspartyl protease family protein, contains l   | 275.0  | 340.1  | 236.9  | 1345.1 | 2352.3 | 813.8  | 2.9  | 6.5E-04 | 5.2E-09 | 6.5E-02 | 4.1E-02 | 1.0E-06 | 3.3E-01 |
| 246389_at   | AT1G77380    | amino acid carrier, putative / amino acid p    | 24.0   | 17.1   | 18.2   | 18.9   | 7.6    | 19.0   | 2.5  | 6.5E-04 | 5.9E-03 | 1.4E-02 | 4.1E-02 | 2.7E-02 | 4.7E-01 |
| 264746_at   | AT1G62300    | WRKY family transcription factor, similar to   | 192.3  | 77.1   | 121.9  | 578.1  | 174.2  | 817.0  | 4.7  | 6.6E-04 | 1.4E-05 | 7.6E-02 | 4.1E-02 | 2.7E-04 | 3.4E-01 |
| 251162_at   | AT3G63300    | expressed protein                              | 47.7   | 38.6   | 37.8   | 83.2   | 45.4   | 40.2   | 2.1  | 6.7E-04 | 6.3E-03 | 5.8E-02 | 4.1E-02 | 2.8E-02 | 3.2E-01 |
| 253662_at   | AT4G30080    | transcriptional factor B3 family protein, cor  | 41.1   | 43.5   | 46.2   | 16.8   | 20.2   | 41.3   | 2.5  | 6.7E-04 | 9.6E-06 | 4.2E-03 | 4.1E-02 | 2.0E-04 | 3.7E-01 |
| 253483_at   | AT4G31910    | transferase family protein, low similarity to  | 57.7   | 101.0  | 100.4  | 46.1   | 126.6  | 115.2  | 2.7  | 6.9E-04 | 7.4E-01 | 3.8E-01 | 4.2E-02 | 9.0E-01 | 6.6E-01 |
| 262505_at   | AT1G21680    | expressed protein, similar to ToIB protein j   | 651.0  | 891.9  | 795.9  | 711.7  | 454.7  | 353.5  | 2.0  | 1.1E-02 | 3.4E-06 | 6.9E-05 | 1.9E-01 | 9.4E-05 | 4.3E-02 |
| 250598_at   | AT5G07690    | myb family transcription factor (MYB29), s     | 12.6   | 17.8   | 21.7   | 9.4    | 13.9   | 34.9   | 3.7  | 7.1E-04 | 8.8E-01 | 8.9E-02 | 4.3E-02 | 9.6E-01 | 3.6E-01 |

|             |              |                                                |       |       |       |        |        |       |     |         |         |         |         |         |         |
|-------------|--------------|------------------------------------------------|-------|-------|-------|--------|--------|-------|-----|---------|---------|---------|---------|---------|---------|
| 266363_at   | AT2G41250    | haloacid dehalogenase-like hydrolase fam       | 130.0 | 144.1 | 158.5 | 45.5   | 60.3   | 136.4 | 3.0 | 7.1E-04 | 2.1E-05 | 8.8E-03 | 4.4E-02 | 3.5E-04 | 4.4E-01 |
| 248282_at   | AT5G52900    | expressed protein                              | 171.2 | 394.0 | 291.6 | 120.1  | 228.4  | 114.9 | 2.3 | 7.3E-04 | 2.0E-04 | 1.6E-01 | 4.4E-02 | 2.0E-03 | 4.4E-01 |
| 246200_at   | AT4G37240    | expressed protein                              | 273.5 | 425.7 | 347.2 | 1111.4 | 1782.7 | 766.1 | 2.3 | 7.4E-04 | 1.1E-08 | 1.9E-02 | 4.4E-02 | 1.8E-06 | 4.4E-01 |
| 247205_at   | AT5G64890    | expressed protein                              | 5.1   | 4.9   | 5.0   | 12.8   | 5.0    | 5.9   | 2.5 | 7.4E-04 | 5.0E-04 | 1.2E-03 | 4.4E-02 | 4.0E-03 | 2.0E-01 |
| 254424_at   | AT4G21510    | F-box family protein, contains Pfam PF006      | 83.5  | 118.9 | 80.9  | 185.0  | 152.1  | 72.7  | 2.5 | 7.5E-04 | 6.2E-03 | 6.8E-03 | 4.4E-02 | 2.8E-02 | 4.4E-01 |
| 253751_at   | AT4G29070    | expressed protein                              | 155.0 | 179.8 | 199.3 | 79.4   | 118.7  | 160.0 | 2.0 | 7.6E-04 | 7.6E-05 | 8.3E-02 | 4.5E-02 | 9.4E-04 | 3.5E-01 |
| 262830_at   | AT1G14700    | purple acid phosphatase, putative, contain     | 111.1 | 153.9 | 211.3 | 44.1   | 55.6   | 94.1  | 2.1 | 7.6E-04 | 2.3E-06 | 7.4E-01 | 4.5E-02 | 7.3E-05 | 8.8E-01 |
| 266591_at   | AT2G46225    | Encodes a subunit of the WAVE complex.         | 598.5 | 506.7 | 520.8 | 246.7  | 197.5  | 422.8 | 2.1 | 7.7E-04 | 1.2E-07 | 5.7E-04 | 4.5E-02 | 8.7E-06 | 1.3E-01 |
| 258367_at   | AT3G14370    | protein kinase family protein, contains prot   | 65.3  | 126.5 | 59.4  | 303.2  | 491.6  | 140.7 | 3.5 | 7.8E-04 | 3.8E-06 | 2.3E-01 | 4.5E-02 | 1.0E-04 | 5.3E-01 |
| 245119_at   | AT2G41640    | expressed protein, contains Pfam domain,       | 150.5 | 64.3  | 76.7  | 967.0  | 548.2  | 382.7 | 2.5 | 7.8E-04 | 1.1E-08 | 3.1E-01 | 4.5E-02 | 1.7E-06 | 6.0E-01 |
| 248134_at   | AT5G54860    | integral membrane transporter family prot      | 216.1 | 117.0 | 127.5 | 599.6  | 246.1  | 298.8 | 2.4 | 7.9E-04 | 1.4E-05 | 6.7E-01 | 4.5E-02 | 2.7E-04 | 8.4E-01 |
| 254810_at   | AT4G12390    | invertase/pectin methylesterase inhibitor fr   | 420.0 | 536.2 | 561.4 | 163.0  | 247.9  | 374.4 | 2.3 | 7.8E-04 | 3.4E-06 | 7.2E-02 | 4.5E-02 | 9.4E-05 | 3.3E-01 |
| 245272_at   | AT4G17250    | expressed protein                              | 9.1   | 6.5   | 7.6   | 42.6   | 23.4   | 12.8  | 3.3 | 8.0E-04 | 3.1E-07 | 6.9E-03 | 4.6E-02 | 1.7E-05 | 4.4E-01 |
| 267592_at   | AT2G39710    | aspartyl protease family protein, contains     | 132.0 | 68.2  | 54.6  | 825.3  | 329.0  | 327.6 | 2.5 | 8.1E-04 | 9.7E-08 | 7.6E-01 | 4.6E-02 | 7.7E-06 | 8.9E-01 |
| 246401_at   | AT1G57560    | myb family transcription factor (MYB50), s     | 5.7   | 5.0   | 4.8   | 18.9   | 17.5   | 7.1   | 2.7 | 8.2E-04 | 4.1E-07 | 5.1E-03 | 4.6E-02 | 2.1E-05 | 4.1E-01 |
| 255443_at   | AT4G02700    | sulfate transporter, identical to sulfate tran | 33.9  | 32.5  | 19.3  | 43.1   | 23.9   | 19.9  | 2.2 | 8.3E-04 | 9.1E-01 | 1.4E-01 | 4.6E-02 | 9.7E-01 | 4.2E-01 |
| 254294_at   | AT4G23070    | rhomboid family protein, contains PFAM d       | 12.7  | 6.4   | 6.3   | 38.1   | 20.4   | 10.0  | 3.8 | 8.2E-04 | 1.1E-04 | 1.9E-01 | 4.6E-02 | 1.3E-03 | 4.8E-01 |
| 248040_at   | AT5G55970    | zinc finger (C3HC4-type RING finger) fami      | 5.0   | 5.4   | 5.2   | 12.9   | 9.1    | 5.0   | 2.6 | 8.3E-04 | 2.4E-05 | 5.0E-04 | 4.6E-02 | 3.9E-04 | 1.2E-01 |
| 245075_at   | AT2G23180    | cytochrome P450, putative                      | 84.1  | 138.7 | 125.9 | 47.9   | 56.6   | 134.5 | 2.8 | 8.3E-04 | 1.4E-03 | 1.4E-02 | 4.6E-02 | 8.7E-03 | 4.6E-01 |
| 266835_at   | AT2G29990    | pyridine nucleotide-disulphide oxidoreduct     | 35.5  | 23.2  | 24.7  | 68.0   | 23.5   | 49.2  | 2.9 | 8.4E-04 | 2.3E-03 | 6.3E-02 | 4.6E-02 | 1.3E-02 | 3.2E-01 |
| 246580_at   | AT1G31770    | ABC transporter family protein, contains P     | 101.0 | 110.0 | 110.8 | 37.3   | 48.1   | 75.3  | 2.0 | 8.5E-04 | 6.2E-08 | 5.2E-03 | 4.6E-02 | 5.7E-06 | 4.1E-01 |
| 263207_at   | AT1G10550    | xyloglucan:xyloglucosyl transferase, putati    | 274.1 | 291.6 | 218.1 | 514.1  | 678.9  | 309.4 | 2.2 | 8.5E-04 | 1.4E-05 | 1.0E-01 | 4.6E-02 | 2.6E-04 | 3.7E-01 |
| 263931_at   | AT2G36220    | expressed protein                              | 597.5 | 639.4 | 543.9 | 1994.5 | 1893.5 | 723.7 | 2.8 | 8.5E-04 | 2.1E-06 | 5.9E-03 | 4.6E-02 | 6.7E-05 | 4.2E-01 |
| 266150_s_at | AT2G12290;AT | [AT2G12290, expressed protein ];[AT4G19        | 13.1  | 27.6  | 34.7  | 15.2   | 15.9   | 28.8  | 2.6 | 8.6E-04 | 1.5E-01 | 1.2E-01 | 4.7E-02 | 3.3E-01 | 4.0E-01 |
| 250012_x_at | AT5G18060    | auxin-responsive protein, putative, similar    | 510.6 | 676.1 | 512.3 | 448.4  | 724.8  | 204.8 | 3.5 | 8.6E-04 | 2.0E-02 | 1.4E-02 | 4.7E-02 | 7.0E-02 | 4.6E-01 |
| 245439_at   | AT4G16670    | expressed protein                              | 14.0  | 13.9  | 17.7  | 8.9    | 9.0    | 26.0  | 2.9 | 8.7E-04 | 1.9E-01 | 2.1E-02 | 4.7E-02 | 4.0E-01 | 4.2E-01 |
| 255931_at   | AT1G12710    | F-box family protein / SKP1 interacting pai    | 37.3  | 53.3  | 42.1  | 53.9   | 80.2   | 38.1  | 2.1 | 8.9E-04 | 1.7E-02 | 4.5E-02 | 4.8E-02 | 6.1E-02 | 3.2E-01 |
| 263823_s_at | AT2G40340;AT | [AT2G40340, encodes a member of the D          | 19.0  | 15.7  | 13.5  | 115.3  | 60.6   | 36.1  | 3.2 | 8.9E-04 | 7.1E-08 | 4.7E-02 | 4.8E-02 | 6.2E-06 | 3.2E-01 |
| 247617_at   | AT5G60270    | lectin protein kinase family protein, contain  | 216.1 | 126.4 | 79.1  | 305.9  | 185.3  | 192.8 | 2.7 | 8.9E-04 | 6.8E-04 | 1.6E-01 | 4.8E-02 | 5.0E-03 | 4.4E-01 |
| 265877_at   | AT2G42380    | bZIP transcription factor family protein       | 21.6  | 43.9  | 35.7  | 25.9   | 53.0   | 20.8  | 2.6 | 9.0E-04 | 6.4E-01 | 4.4E-02 | 4.8E-02 | 8.5E-01 | 3.2E-01 |
| 245319_at   | AT4G16146    | expressed protein                              | 366.8 | 330.0 | 401.8 | 168.8  | 189.8  | 346.8 | 2.1 | 9.2E-04 | 2.3E-05 | 1.4E-02 | 4.9E-02 | 3.8E-04 | 4.7E-01 |
| 247704_at   | AT5G59510    | expressed protein                              | 4.2   | 4.1   | 4.2   | 20.0   | 4.2    | 33.4  | 8.0 | 9.4E-04 | 1.4E-05 | 1.2E-03 | 4.9E-02 | 2.7E-04 | 2.0E-01 |
| 265732_at   | AT2G01300    | expressed protein                              | 84.3  | 134.0 | 115.4 | 294.5  | 455.6  | 94.3  | 4.8 | 9.6E-04 | 1.3E-04 | 1.3E-03 | 5.0E-02 | 1.4E-03 | 2.1E-01 |

### SI - Table 3A Overrepresented Gene Ontology functional categories - 272 genes

Overrepresentation

Selected statistical test : Hypergeometric test

Selected correction : Benjamini & Hochberg False Discovery Rate (FDR) correction

Selected significance level : 0.05

Testing option : Test cluster versus whole annotation

Number of annotated genes in selection : 234

Number of annotated genes in network/whole annotation : 25168

| GO-ID | p-value  | corr p-val | # selected | # total | Description                     | Genes in test set                                                                                                                                                                                                                                                                                                                                  |
|-------|----------|------------|------------|---------|---------------------------------|----------------------------------------------------------------------------------------------------------------------------------------------------------------------------------------------------------------------------------------------------------------------------------------------------------------------------------------------------|
| 9725  | 2.88E-17 | 1.55E-14   | 33         | 413     | response to hormone stimulus    | AT4G34760 AT3G50660 AT2G34650 AT3G60690 AT5G08130 AT1G29460 AT5G65310 AT4G32280 AT2G45210 AT4G38860 AT1G71030 AT5G18060 AT2G26710 AT2G18010 AT2G31230 AT3G23030 AT3G61460 AT1G57560 AT1G29510 AT4G36110 AT1G15550 AT4G38840 AT4G12410 AT5G47370 AT4G30080 AT1G29450 AT1G13260 AT1G29440 AT4G03400 AT5G54490 AT1G29500 AT4G39400 AT4G38850          |
| 9733  | 1.44E-14 | 3.86E-12   | 23         | 201     | response to auxin stimulus      | AT4G36110 AT4G34760 AT4G38840 AT2G34650 AT3G60690 AT4G12410 AT5G47370 AT4G30080 AT1G29460 AT1G29450 AT1G29440 AT4G32280 AT2G45210 AT4G03400 AT4G38860 AT5G54490 AT5G18060 AT2G18010 AT3G23030 AT1G29500 AT1G57560 AT4G38850 AT1G29510                                                                                                              |
| 9719  | 1.35E-13 | 2.42E-11   | 34         | 584     | response to endogenous stimulus | AT4G34760 AT3G50660 AT2G34650 AT3G60690 AT5G08130 AT1G29460 AT5G65310 AT4G32280 AT2G45210 AT4G38860 AT1G71030 AT5G18060 AT2G26710 AT2G18010 AT2G31230 AT3G23030 AT3G61460 AT1G57560 AT1G29510 AT4G36110 AT1G15550 AT1G8840 AT4G38840 AT4G12410 AT5G47370 AT4G30080 AT1G29450 AT1G29440 AT1G13260 AT4G03400 AT5G54490 AT1G29500 AT4G39400 AT4G38850 |

|       |          |          |    |      |                                      |                                                                                                                                                                                                                                                                                                                                                                                                                                                                                                 |
|-------|----------|----------|----|------|--------------------------------------|-------------------------------------------------------------------------------------------------------------------------------------------------------------------------------------------------------------------------------------------------------------------------------------------------------------------------------------------------------------------------------------------------------------------------------------------------------------------------------------------------|
| 42221 | 2.73E-12 | 3.65E-10 | 37 | 775  | response to chemical stimulus        | AT5G16980 AT4G34760 AT3G50660 AT2G34650 AT3G60690 AT5G08130 AT1G29460 AT5G65310 AT4G32280 AT2G45210 AT4G38860 AT1G71030 AT5G18060 AT2G26710 AT2G18010 AT2G31230 AT3G23030 AT3G61460 AT1G57560 AT1G29510 AT4G36110 AT1G15550 AT1G80840 AT4G38840 AT4G12410 AT5G47370 AT4G30080 AT3G23550 AT1G29450 AT1G29440 AT1G13260 AT4G03400 AT5G54490 AT4G23030 AT1G29500 AT4G39400 AT4G38850                                                                                                               |
| 50896 | 1.08E-07 | 1.16E-05 | 48 | 1755 | response to stimulus                 | AT5G16980 AT4G34760 AT3G50660 AT2G34650 AT3G60690 AT1G55920 AT5G08130 AT2G43280 AT1G29460 AT5G05690 AT5G65310 AT4G32280 AT2G45210 AT4G38860 AT1G71030 AT5G18060 AT2G26710 AT2G18010 AT2G31230 AT3G23030 AT3G61460 AT1G57560 AT1G29510 AT2G04240 AT3G04210 AT4G36110 AT1G15550 AT1G54050 AT1G80840 AT4G38840 AT4G12410 AT5G47370 AT4G30080 AT4G37590 AT3G23550 AT1G29450 AT1G29440 AT1G13260 AT4G03400 AT4G17250 AT5G54490 AT3G55120 AT4G23030 AT1G29500 AT1G19320 AT4G39400 AT4G38850 AT5G67450 |
| 9741  | 1.71E-05 | 1.53E-03 | 6  | 14   | response to brassinosteroid stimulus | AT1G13260 AT3G50660 AT2G26710 AT5G08130 AT3G61460 AT4G39400                                                                                                                                                                                                                                                                                                                                                                                                                                     |
| 30528 | 5.56E-04 | 4.25E-02 | 35 | 1370 | transcription regulator activity     | AT1G16640 AT3G25710 AT2G42280 AT2G42380 AT5G13180 AT5G08130 AT5G63790 AT4G23810 AT5G65310 AT3G13040 AT5G61600 AT1G31310 AT2G37590 AT1G71030 AT2G38470 AT2G31230 AT2G45680 AT1G57560 AT2G23320 AT2G28510 AT1G80840 AT1G68810 AT3G50650 AT5G39610 AT5G47370 AT4G30080 AT5G60200 AT1G22190 AT4G30410 AT3G50750 AT3G45610 AT1G62300 AT5G67450 AT4G36780 AT2G43060                                                                                                                                   |



|       |          |          |    |      |                                                   |                                                                                                                                                                                                                                                                                                                                           |
|-------|----------|----------|----|------|---------------------------------------------------|-------------------------------------------------------------------------------------------------------------------------------------------------------------------------------------------------------------------------------------------------------------------------------------------------------------------------------------------|
| 3700  | 1.83E-03 | 1.23E-01 | 31 | 1178 | transcription factor activity                     | AT3G25710 AT1G16640 AT2G42280 AT2G42380 AT5G08130 AT5G13180 AT5G63790 AT4G23810 AT5G65310 AT3G13040 AT5G61600 AT1G31310 AT1G71030 AT2G37590 AT2G38470 AT2G31230 AT2G45680 AT2G23320 AT1G57560 AT2G28510 AT1G80840 AT1G68810 AT3G50650 AT5G39610 AT4G30080 AT5G60200 AT1G22190 AT4G30410 AT3G45610 AT1G62300 AT2G43060                     |
| 10268 | 7.83E-02 | 4.66E+00 | 3  | 5    | brassinosteroid homeostasis                       | AT2G26710 AT4G39400 AT5G05690                                                                                                                                                                                                                                                                                                             |
| 3677  | 1.45E-01 | 7.76E+00 | 33 | 1600 | DNA binding                                       | AT3G25710 AT1G16640 AT2G42280 AT2G42380 AT5G13180 AT5G08130 AT5G63790 AT4G23810 AT5G65310 AT3G13040 AT5G61600 AT1G31310 AT1G71030 AT2G37590 AT2G38470 AT5G27670 AT2G31230 AT2G45680 AT1G57560 AT2G23320 AT2G28510 AT1G80840 AT1G68810 AT3G50650 AT5G39610 AT4G30080 AT5G60200 AT1G22190 AT4G30410 AT1G13260 AT3G45610 AT1G62300 AT2G43060 |
| 16128 | 6.40E-01 | 2.86E+01 | 3  | 9    | phytosteroid metabolism                           | AT3G50660 AT2G26710 AT5G05690                                                                                                                                                                                                                                                                                                             |
| 16131 | 6.40E-01 | 2.86E+01 | 3  | 9    | brassinosteroid metabolism                        | AT3G50660 AT2G26710 AT5G05690                                                                                                                                                                                                                                                                                                             |
| 8395  | 8.61E-01 | 3.55E+01 | 2  | 2    | steroid hydroxylase activity                      | AT3G50660 AT2G26710                                                                                                                                                                                                                                                                                                                       |
| 16567 | 7.19E+00 | 2.73E+02 | 5  | 76   | protein ubiquitination                            | AT3G19380 AT1G49780 AT1G66160 AT5G09800 AT3G49810                                                                                                                                                                                                                                                                                         |
| 10224 | 8.05E+00 | 2.73E+02 | 3  | 20   | response to UV-B                                  | AT3G55120 AT4G39400 AT5G05690                                                                                                                                                                                                                                                                                                             |
| 9755  | 8.58E+00 | 2.73E+02 | 5  | 79   | hormone-mediated signaling                        | AT5G65310 AT2G34650 AT5G47370 AT2G31230 AT5G08130                                                                                                                                                                                                                                                                                         |
| 9653  | 8.65E+00 | 2.73E+02 | 7  | 212  | morphogenesis                                     | AT3G50660 AT2G34650 AT5G47370 AT2G46225 AT4G39400 AT2G22860 AT5G05690                                                                                                                                                                                                                                                                     |
| 9628  | 1.10E+01 | 3.19E+02 | 13 | 513  | response to abiotic stimulus                      | AT2G04240 AT1G54050 AT4G38840 AT2G43280 AT4G37590 AT5G05690 AT4G03400 AT1G71030 AT4G17250 AT2G26710 AT3G55120 AT4G39400 AT5G67450                                                                                                                                                                                                         |
| 32446 | 1.13E+01 | 3.19E+02 | 5  | 84   | protein modification by small protein conjugation | AT3G19380 AT1G49780 AT1G66160 AT5G09800 AT3G49810                                                                                                                                                                                                                                                                                         |
| 16132 | 1.26E+01 | 3.22E+02 | 2  | 6    | brassinosteroid biosynthesis                      | AT3G50660 AT5G05690                                                                                                                                                                                                                                                                                                                       |
| 16129 | 1.26E+01 | 3.22E+02 | 2  | 6    | phytosteroid biosynthesis                         | AT3G50660 AT5G05690                                                                                                                                                                                                                                                                                                                       |
| 9826  | 1.49E+01 | 3.64E+02 | 4  | 53   | unidimensional cell growth                        | AT3G50660 AT5G47370 AT4G39400 AT5G05690                                                                                                                                                                                                                                                                                                   |

|      |          |          |    |      |                            |                                                                                                                                                                                                                                                           |
|------|----------|----------|----|------|----------------------------|-----------------------------------------------------------------------------------------------------------------------------------------------------------------------------------------------------------------------------------------------------------|
| 7148 | 1.78E+01 | 4.02E+02 | 5  | 93   | cell morphogenesis         | AT3G50660 AT5G47370 AT2G46225 AT4G39400 AT5G05690                                                                                                                                                                                                         |
| 5634 | 1.80E+01 | 4.02E+02 | 25 | 1427 | nucleus                    | AT3G25710 AT2G42280 AT2G42380 AT3G13040 AT1G31310 AT5G61600 AT1G71030 AT1G59660 AT2G37590 AT5G27670 AT3G23030 AT2G31230 AT2G45680 AT2G23320 AT1G57560 AT1G80840 AT1G68810 AT5G39610 AT4G30080 AT5G60200 AT1G22190 AT3G55120 AT1G29500 AT5G67450 AT2G43060 |
| 9416 | 2.07E+01 | 4.44E+02 | 7  | 190  | response to light stimulus | AT4G03400 AT2G26710 AT3G55120 AT2G43280 AT4G37590 AT4G39400 AT5G05690                                                                                                                                                                                     |
| 151  | 2.24E+01 | 4.49E+02 | 5  | 98   | ubiquitin ligase complex   | AT3G19380 AT1G49780 AT1G66160 AT5G09800 AT3G49810                                                                                                                                                                                                         |
| 9314 | 2.26E+01 | 4.49E+02 | 7  | 193  | response to radiation      | AT4G03400 AT2G26710 AT3G55120 AT2G43280 AT4G37590 AT4G39400 AT5G05690                                                                                                                                                                                     |

### SI - Table 3B Overrepresented Gene Ontology functional categories - 31 BIK specific genes

Overrepresentation

Selected statistical test : Hypergeometric test

Selected correction : Benjamini & Hochberg False Discovery Rate (FDR) correction

Selected significance level : 0.05

Testing option : Test cluster versus whole annotation

Number of annotated genes in selection : 26

Number of annotated genes in network/whole annotation : 25168

| GO-ID | p-value  | corr p-val | # selected | # total | Description                             | Genes in test set |
|-------|----------|------------|------------|---------|-----------------------------------------|-------------------|
| 15591 | 1.03E+01 | 3.00E+02   | 1          | 1       | D-ribose transporter activity           | AT3G18830         |
| 15575 | 1.03E+01 | 3.00E+02   | 1          | 1       | mannitol transporter activity           | AT3G18830         |
| 15576 | 1.03E+01 | 3.00E+02   | 1          | 1       | sorbitol transporter activity           | AT3G18830         |
| 5365  | 1.03E+01 | 3.00E+02   | 1          | 1       | myo-inositol transporter activity       | AT3G18830         |
| 15148 | 1.03E+01 | 3.00E+02   | 1          | 1       | D-xylose transporter activity           | AT3G18830         |
| 15146 | 1.03E+01 | 3.00E+02   | 1          | 1       | pentose transporter activity            | AT3G18830         |
| 15168 | 2.07E+01 | 3.59E+02   | 1          | 2       | glycerol transporter activity           | AT3G18830         |
| 5354  | 2.07E+01 | 3.59E+02   | 1          | 2       | galactose transporter activity          | AT3G18830         |
| 9970  | 2.07E+01 | 3.59E+02   | 1          | 2       | cellular response to sulfate starvation | AT1G55920         |
| 15166 | 2.07E+01 | 3.59E+02   | 1          | 2       | polyol transporter activity             | AT3G18830         |
| 9001  | 3.10E+01 | 3.99E+02   | 1          | 3       | serine O-acetyltransferase activity     | AT1G55920         |
| 16412 | 3.10E+01 | 3.99E+02   | 1          | 3       | serine O-acyltransferase activity       | AT1G55920         |
| 15665 | 3.10E+01 | 3.99E+02   | 1          | 3       | alcohol transporter activity            | AT3G18830         |
| 5402  | 4.13E+01 | 3.99E+02   | 1          | 4       | cation:sugar symporter activity         | AT3G18830         |
| 5403  | 4.13E+01 | 3.99E+02   | 1          | 4       | hydrogen:sugar symporter activity       | AT3G18830         |
| 15295 | 4.13E+01 | 3.99E+02   | 1          | 4       | solute:hydrogen symporter activity      | AT3G18830         |
| 5355  | 4.13E+01 | 3.99E+02   | 1          | 4       | glucose transporter activity            | AT3G18830         |
| 16413 | 4.13E+01 | 3.99E+02   | 1          | 4       | O-acetyltransferase activity            | AT1G55920         |
| 15149 | 5.16E+01 | 4.72E+02   | 1          | 5       | hexose transporter activity             | AT3G18830         |

**SI - Table 4A Fold-change of BIK and BL regulated genes.**

The comparisons from left-to-right are: BIK- vs. mock-treated 0.5h; BL- vs. mock-treated 0.5h; BIK- vs. mock-treated 2h; BL- vs. mock-treated 2h

**COMMON DOWNREGULATED GENES  
EARLY**

| Affymetrix nc | Accession no.       | Annotation                                            | treatment/mock |     |     |     |
|---------------|---------------------|-------------------------------------------------------|----------------|-----|-----|-----|
|               |                     |                                                       | 0.5h           |     | 2h  |     |
|               |                     |                                                       | BIK            | BL  | BIK | BL  |
| 250248_at     | AT5G13740           | sugar transporter family protein                      | 0.8            | 0.8 | 0.2 | 0.4 |
| 245439_at     | AT4G16670           | expressed protein                                     | 0.8            | 0.8 | 0.3 | 0.3 |
| 257374_at     | AT2G43280           | far-red impaired responsive family protein / FAR1 far | 0.8            | 0.8 | 0.5 | 0.5 |
| 266124_at     | AT2G45080           | cyclin family protein, similar to cyclin 2            | 0.8            | 0.8 | 0.1 | 0.3 |
| 250569_at     | AT5G08130           | <b>basic helix-loop-helix (bHLH) protein (BIM1)</b>   | 0.8            | 0.8 | 0.4 | 0.4 |
| 253351_at     | AT4G33700           | CBS domain-containing protein                         | 0.7            | 0.8 | 0.4 | 0.5 |
| 258100_at     | AT3G23550           | MATE efflux family protein                            | 0.7            | 0.8 | 0.4 | 0.3 |
| 261400_at     | AT1G79630           | protein phosphatase 2C family protein / PP2C family   | 0.6            | 0.8 | 0.3 | 0.4 |
| 267305_at     | AT2G30070           | potassium transporter (KUP1)                          | 0.6            | 0.8 | 0.2 | 0.4 |
| 258091_at     | AT3G14560           | expressed protein                                     | 0.6            | 0.8 | 0.4 | 0.5 |
| 250598_at     | AT5G07690           | myb family transcription factor (MYB29)               | 0.6            | 0.8 | 0.3 | 0.4 |
| 260655_at     | AT1G19320           | pathogenesis-related thaumatin family protein         | 0.5            | 0.8 | 0.5 | 0.4 |
| 253812_at     | AT4G28240           | wound-responsive protein-related                      | 0.5            | 0.8 | 0.3 | 0.4 |
| 257858_at     | AT3G12920           | expressed protein                                     | 0.4            | 0.8 | 0.3 | 0.4 |
| 251321_at     | AT3G61460           | <b>zinc finger (C3HC4-type RING finger) (BRH1)</b>    | 0.4            | 0.8 | 0.3 | 0.4 |
| 247933_at     | AT5G56980           | expressed protein                                     | 0.4            | 0.8 | 0.2 | 0.2 |
| 266150_s_at   | AT2G12290;AT4G19700 | [AT2G12290, expressed protein ];[AT4G19700, expr      | 0.4            | 0.8 | 0.5 | 0.6 |
| 246584_at     | AT5G14730           | expressed protein                                     | 0.4            | 0.8 | 0.5 | 0.6 |
| 245136_at     | AT2G45210           | auxin-responsive protein-related                      | 0.3            | 0.8 | 0.2 | 0.2 |
| 246063_at     | AT5G19340           | expressed protein                                     | 0.8            | 0.7 | 0.2 | 0.4 |
| 249467_at     | AT5G39610           | no apical meristem (NAM) family protein               | 0.7            | 0.7 | 0.3 | 0.2 |
| 248646_at     | AT5G49100           | expressed protein                                     | 0.7            | 0.7 | 0.6 | 0.4 |
| 258021_at     | AT3G19380           | U-box domain-containing protein                       | 0.7            | 0.7 | 0.5 | 0.3 |
| 245761_at     | AT1G66890           | expressed protein                                     | 0.6            | 0.7 | 0.1 | 0.3 |
| 257766_at     | AT3G23030           | auxin-responsive protein (IAA2)                       | 0.6            | 0.7 | 0.2 | 0.4 |
| 262830_at     | AT1G14700           | purple acid phosphatase                               | 0.5            | 0.7 | 0.5 | 0.6 |
| 250327_at     | AT5G12050           | expressed protein                                     | 0.5            | 0.7 | 0.3 | 0.3 |
| 246284_at     | AT4G36780           | <b>similar to BZR1 protein (BEH2)</b>                 | 0.5            | 0.7 | 0.0 | 0.1 |
| 246495_at     | AT5G16200           | 50S ribosomal protein-related                         | 0.4            | 0.7 | 0.1 | 0.2 |
| 253423_at     | AT4G32280           | auxin-responsive AUX/IAA family protein (IAA29)       | 0.3            | 0.7 | 0.1 | 0.2 |
| 261456_at     | AT1G21050           | expressed protein                                     | 0.3            | 0.7 | 0.1 | 0.2 |
| 258196_at     | AT3G13980           | expressed protein                                     | 0.3            | 0.7 | 0.1 | 0.4 |
| 254024_at     | AT4G25780           | pathogenesis-related protein                          | 0.1            | 0.7 | 0.2 | 0.3 |
| 250907_at     | AT5G03670           | expressed protein                                     | 0.6            | 0.6 | 0.3 | 0.4 |
| 245276_at     | AT4G16780           | homeobox-leucine zipper protein 4 (HAT4)              | 0.5            | 0.6 | 0.4 | 0.5 |
| 247754_at     | AT5G59080           | expressed protein                                     | 0.5            | 0.6 | 0.4 | 0.5 |
| 261772_at     | AT1G76240           | expressed protein                                     | 0.4            | 0.6 | 0.1 | 0.2 |
| 245885_at     | AT5G09440           | phosphate-responsive protein                          | 0.4            | 0.6 | 0.1 | 0.1 |
| 259364_at     | AT1G13260           | <b>DNA-binding protein RAV1 (RAV1)</b>                | 0.3            | 0.6 | 0.5 | 0.7 |
| 261597_at     | AT1G49780           | U-box domain-containing protein, similar to immediat  | 0.7            | 0.5 | 0.6 | 0.3 |
| 252184_at     | AT3G50660           | <b>steroid 22-alpha-hydroxylase (CYP90B1) (DWF4)</b>  | 0.5            | 0.5 | 0.0 | 0.0 |
| 251072_at     | AT5G01740           | expressed protein, wound-inducible protein wun1 pro   | 0.3            | 0.5 | 0.3 | 0.5 |
| 245362_at     | AT4G17460           | homeobox-leucine zipper protein 1 (HAT1)              | 0.3            | 0.5 | 0.1 | 0.2 |
| 255538_at     | AT4G01680           | myb family transcription factor (MYB55)               | 0.2            | 0.5 | 0.1 | 0.1 |
| 247880_at     | AT5G57780           | expressed protein                                     | 0.4            | 0.4 | 0.1 | 0.1 |
| 261892_at     | AT1G80840           | WRKY family transcription factor                      | 0.4            | 0.3 | 0.2 | 0.1 |
| 265245_at     | AT2G43060           | similar to cDNA bHLH transcription factor (bHLH zeta  | 0.3            | 0.3 | 0.2 | 0.4 |
| 247177_at     | AT5G65300           | expressed protein                                     | 0.3            | 0.3 | 0.2 | 0.4 |

|             |                     |                                                             |     |     |     |     |
|-------------|---------------------|-------------------------------------------------------------|-----|-----|-----|-----|
| 256598_at   | AT3G30180           | <b>cytochrome p450 enzyme (BR6OX2)</b>                      | 0.1 | 0.3 | 0.1 | 0.1 |
| 255177_at   | AT4G08040           | 1-aminocyclopropane-1-carboxylate synthase, putativ         | 0.1 | 0.1 | 0.0 | 0.0 |
| 262259_s_at | AT1G53870;AT1G53870 | [AT1G53870, expressed protein, contains Pfam profil         | 0.4 | 1.0 | 0.5 | 0.8 |
| 267515_at   | AT2G45680           | TCP family transcription factor, putative, similar to PC    | 0.5 | 1.0 | 0.5 | 0.8 |
| 264091_at   | AT1G79110           | expressed protein                                           | 0.7 | 1.0 | 0.4 | 0.8 |
| 260034_at   | AT1G68810           | basic helix-loop-helix (bHLH) family protein, contains      | 0.8 | 1.0 | 0.4 | 0.8 |
| 253751_at   | AT4G29070           | expressed protein                                           | 0.8 | 1.0 | 0.5 | 0.7 |
| 246516_at   | AT5G15740           | expressed protein, contains Pfam PF03138: Plant pro         | 0.8 | 1.0 | 0.5 | 0.7 |
| 257746_at   | AT3G29200           | chorismate mutase, chloroplast (CM1), identical to ch       | 0.8 | 1.0 | 0.5 | 0.7 |
| 258189_at   | AT3G17860           | expressed protein                                           | 0.8 | 1.0 | 0.5 | 0.7 |
| 254810_at   | AT4G12390           | invertase/pectin methylesterase inhibitor family protei     | 0.7 | 1.0 | 0.4 | 0.7 |
| 252890_at   | AT4G39400           | <b>brassinosteroid insensitive 1 (BR1)</b>                  | 0.7 | 1.0 | 0.5 | 0.6 |
| 262500_at   | AT1G21760           | F-box family protein, Contains PF:00646 F-box doma          | 0.8 | 1.0 | 0.5 | 0.6 |
| 253629_at   | AT4G30450           | glycine-rich protein                                        | 0.8 | 1.0 | 0.4 | 0.6 |
| 252296_at   | AT3G48970           | copper-binding family protein, similar to copper home       | 0.4 | 1.0 | 0.4 | 0.6 |
| 262951_at   | AT1G75500           | nodulin MtN21 family protein, similar to MtN21 GB:C/        | 0.7 | 1.0 | 0.4 | 0.6 |
| 259373_at   | AT1G69160           | expressed protein                                           | 0.7 | 1.0 | 0.3 | 0.6 |
| 265511_at   | AT2G05540           | glycine-rich protein                                        | 0.7 | 1.0 | 0.5 | 0.5 |
| 246735_at   | AT5G27670           | histone H2A, putative, similar to histone H2A Lycoper       | 0.8 | 1.0 | 0.4 | 0.5 |
| 245987_at   | AT5G13180           | no apical meristem (NAM) family protein, contains Pf        | 0.8 | 1.0 | 0.4 | 0.5 |
| 264900_at   | AT1G23080           | auxin efflux carrier protein, putative, similar to efflux c | 0.8 | 1.0 | 0.3 | 0.5 |
| 261700_at   | AT1G32690           | expressed protein, similar to hypothetical protein GB:      | 0.4 | 1.0 | 0.3 | 0.5 |
| 247478_at   | AT5G62360           | invertase/pectin methylesterase inhibitor family protei     | 0.5 | 1.0 | 0.2 | 0.5 |
| 257642_at   | AT3G25710           | basic helix-loop-helix (bHLH) family protein, contains      | 0.5 | 1.0 | 0.1 | 0.5 |
| 251839_at   | AT3G54950           | patatin-related, low similarity to patatin (GI:169500)(S    | 0.6 | 1.0 | 0.4 | 0.4 |
| 245075_at   | AT2G23180           | cytochrome P450, putative                                   | 0.7 | 1.0 | 0.4 | 0.4 |
| 266363_at   | AT2G41250           | haloacid dehalogenase-like hydrolase family protein,        | 0.8 | 1.0 | 0.3 | 0.4 |
| 261292_at   | AT1G36940           | expressed protein                                           | 0.5 | 1.0 | 0.3 | 0.4 |
| 254809_at   | AT4G12410           | auxin-responsive family protein, similar to GP:546362       | 0.7 | 1.0 | 0.3 | 0.4 |
| 250752_at   | AT5G05690           | <b>cytochrome P450 90A1 (CYP90A1) (CYP90) (CPD)</b>         | 0.6 | 1.0 | 0.3 | 0.4 |
| 267628_at   | AT2G42280           | basic helix-loop-helix (bHLH) family protein                | 0.7 | 1.0 | 0.3 | 0.4 |
| 259683_at   | AT1G63050           | membrane bound O-acyl transferase (MBOAT) family            | 0.7 | 1.0 | 0.3 | 0.4 |
| 266799_at   | AT2G22860           | phytosulfokines 2 (PSK2), identical to phytosulfokines      | 0.7 | 1.0 | 0.2 | 0.4 |
| 259596_at   | AT1G28130           | encodes an IAA-amido synthase that conjugates Asp           | 0.6 | 1.0 | 0.4 | 0.3 |
| 255942_at   | AT1G22360           | UDP-glucuronosyl/UDP-glucosyl transferase family p          | 0.8 | 1.0 | 0.3 | 0.3 |
| 252178_at   | AT3G50750           | <b>brassinosteroid signalling positive regulator (BE</b>    | 0.6 | 1.0 | 0.3 | 0.3 |
| 259848_at   | AT1G72180           | leucine-rich repeat transmembrane protein kinase, pu        | 0.5 | 1.0 | 0.1 | 0.2 |
| 245784_at   | AT1G32190           | expressed protein                                           | 0.7 | 1.0 | 0.1 | 0.1 |
| 251176_at   | AT3G63380           | calcium-transporting ATPase, plasma membrane-typ            | 0.8 | 1.0 | 0.1 | 0.1 |
| 245325_at   | AT4G14130           | xyloglucan:xyloglucosyl transferase, putative / xyloglu     | 0.4 | 1.0 | 0.0 | 0.1 |
| 257855_at   | AT3G13040           | myb family transcription factor, contains Pfam profile:     | 1.0 | 0.8 | 0.5 | 0.5 |
| 245319_at   | AT4G16146           | expressed protein                                           | 1.0 | 0.8 | 0.5 | 0.5 |
| 250493_at   | AT5G09800           | U-box domain-containing protein, low similarity to imr      | 1.0 | 0.8 | 0.8 | 0.3 |
| 247351_at   | AT5G63790           | no apical meristem (NAM) family protein, contains Pf        | 1.0 | 0.5 | 0.7 | 0.3 |
| 260243_at   | AT1G63720           | expressed protein, similar to putative protein GB:CA        | 1.0 | 0.7 | 0.2 | 0.2 |
| 259751_at   | AT1G71030           | Encodes a putative myb family transcription factor. Ir      | 1.0 | 0.8 | 0.5 | 0.1 |
| 253999_at   | AT4G26200           | 1-aminocyclopropane-1-carboxylate synthase, putativ         | 1.0 | 0.3 | 0.2 | 0.1 |
| <b>LATE</b> |                     |                                                             |     |     |     |     |
| 250537_at   | AT5G08565           | expressed protein                                           | 1.0 | 1.0 | 0.4 | 0.8 |
| 256960_at   | AT3G13510           | expressed protein                                           | 1.0 | 1.0 | 0.4 | 0.8 |
| 251827_at   | AT3G55120           | chalcone-flavanone isomerase                                | 1.0 | 1.0 | 0.4 | 0.7 |
| 246580_at   | AT1G31770           | ABC transporter family protein                              | 1.0 | 1.0 | 0.5 | 0.6 |
| 253062_at   | AT4G37590           | phototropic-responsive NPH3 family protein                  | 1.0 | 1.0 | 0.4 | 0.5 |
| 253662_at   | AT4G30080           | transcriptional factor B3 family protein                    | 1.0 | 1.0 | 0.4 | 0.5 |
| 266591_at   | AT2G46225           | Encodes a subunit of the WAVE complex                       | 1.0 | 1.0 | 0.6 | 0.5 |
| 253617_at   | AT4G30410           | expressed protein, similar to cDNA bHLH transcriptio        | 1.0 | 1.0 | 0.4 | 0.4 |

|           |           |                                                         |     |     |     |     |
|-----------|-----------|---------------------------------------------------------|-----|-----|-----|-----|
| 247077_at | AT5G66420 | expressed protein                                       | 1.0 | 1.0 | 0.4 | 0.4 |
| 253247_at | AT4G34610 | homeodomain-containing protein, similarity to homeo     | 1.0 | 1.0 | 0.4 | 0.4 |
| 248419_at | AT5G51550 | phosphate-responsive 1 family protein                   | 1.0 | 1.0 | 0.4 | 0.4 |
| 259985_at | AT1G76620 | expressed protein                                       | 1.0 | 1.0 | 0.3 | 0.4 |
| 262531_at | AT1G17230 | leucine-rich repeat family protein / protein kinase fam | 1.0 | 1.0 | 0.2 | 0.4 |
| 262050_at | AT1G80130 | expressed protein                                       | 1.0 | 1.0 | 0.2 | 0.4 |
| 252387_at | AT3G47800 | aldose 1-epimerase family protein                       | 1.0 | 1.0 | 0.6 | 0.3 |
| 262635_at | AT1G06570 | 4-hydroxyphenylpyruvate dioxygenase (HPD)               | 1.0 | 1.0 | 0.3 | 0.3 |
| 251342_at | AT3G60690 | auxin-responsive family protein, similar to auxin-induc | 1.0 | 1.0 | 0.3 | 0.3 |
| 247191_at | AT5G65310 | homeobox-leucine zipper protein 5 (HB-5) / HD-ZIP tr    | 1.0 | 1.0 | 0.2 | 0.3 |
| 247704_at | AT5G59510 | expressed protein                                       | 1.0 | 1.0 | 0.6 | 0.1 |
| 256762_at | AT3G25655 | expressed protein                                       | 1.0 | 1.0 | 0.2 | 0.1 |

### COMMON UPREGULATED GENES

#### EARLY

|             |               |                                                          |     |     |     |     |
|-------------|---------------|----------------------------------------------------------|-----|-----|-----|-----|
| 253103_at   | AT4G36110     | auxin-responsive protein, putative                       | 1.2 | 2.3 | 4.6 | 7.9 |
| 264083_at   | AT2G31230     | encodes a member of the ERF (ethylene response fa        | 2.1 | 1.7 | 3.2 | 2.7 |
| 255443_at   | AT4G02700     | sulfate transporter                                      | 1.8 | 1.7 | 2.2 | 1.2 |
| 262124_at   | AT1G59660     | nucleoporin family protein                               | 1.4 | 1.7 | 2.9 | 3.1 |
| 260287_at   | AT1G80440     | kelch repeat-containing F-box family protein             | 1.4 | 1.7 | 2.9 | 2.9 |
| 255403_at   | AT4G03400     | auxin-responsive GH3 family protein                      | 1.2 | 1.7 | 1.3 | 2.1 |
| 262315_at   | AT1G70990     | proline-rich family protein                              | 1.7 | 1.6 | 3.5 | 2.2 |
| 265806_at   | AT2G18010     | auxin-responsive family protein (SAUR10)                 | 1.3 | 1.6 | 3.9 | 9.1 |
| 262630_at   | AT1G06520     | membrane associated mitochondrial localized protein      | 1.3 | 1.6 | 2.3 | 3.1 |
| 249765_at   | AT5G24030     | C4-dicarboxylate transporter/malic acid transport fam    | 2.3 | 1.4 | 1.7 | 1.9 |
| 254292_at   | AT4G23030     | MATE efflux protein-related                              | 1.6 | 1.4 | 5.2 | 2.2 |
| 245262_at   | AT4G16563     | aspartyl protease family protein                         | 1.2 | 1.4 | 1.7 | 2.9 |
| 256528_at   | AT1G66140     | zinc finger (C2H2 type) family protein                   | 1.2 | 1.4 | 1.6 | 2.2 |
| 249752_at   | AT5G24660     | expressed protein                                        | 2.4 | 1.3 | 3.6 | 2.3 |
| 247444_at   | AT5G62630     | expressed protein                                        | 1.6 | 1.3 | 2.3 | 1.3 |
| 255037_at   | AT4G09460     | myb family transcription factor                          | 1.5 | 1.3 | 3.3 | 2.8 |
| 263207_at   | AT1G10550     | xyloglucan:xyloglucosyl transferase                      | 1.3 | 1.3 | 1.7 | 2.2 |
| 256453_at   | AT1G75270     | dehydroascorbate reductase                               | 1.2 | 1.3 | 2.6 | 1.7 |
| 253828_at   | AT4G27970     | C4-dicarboxylate transporter/malic acid transport fam    | 2.4 | 1.2 | 3.0 | 1.3 |
| 266693_at   | AT2G19800     | expressed protein                                        | 2.3 | 1.2 | 2.2 | 1.8 |
| 253281_at   | AT4G34138     | UDP-glucuronosyl/UDP-glucosyl transferase family p       | 1.5 | 1.2 | 3.2 | 1.7 |
| 252173_at   | AT3G50650     | scarecrow-like transcription factor 7 (SCL7)             | 1.5 | 1.2 | 2.5 | 1.8 |
| 263823_s_at | AT2G40340;AT2 | [AT2G40340, encodes a member of the DREB subfa           | 1.4 | 1.2 | 3.2 | 1.7 |
| 258075_at   | AT3G25900     | homocysteine S-methyltransferase 1 (HMT-1)               | 1.3 | 1.2 | 2.7 | 2.2 |
| 263002_at   | AT1G54200     | expressed protein                                        | 1.3 | 1.2 | 2.2 | 2.1 |
| 267393_at   | AT2G44500     | expressed protein                                        | 1.3 | 1.2 | 2.2 | 2.1 |
| 263150_at   | AT1G54050     | 17.4 kDa class III heat shock protein (HSP17.4-CIII),    | 1.2 | 1.0 | 2.9 | 3.6 |
| 246401_at   | AT1G57560     | myb family transcription factor (MYB50), similar to DM   | 1.2 | 1.0 | 2.7 | 2.5 |
| 254294_at   | AT4G23070     | rhomboid family protein, contains PFAM domain PF0        | 2.0 | 1.0 | 3.8 | 2.0 |
| 245272_at   | AT4G17250     | expressed protein                                        | 1.2 | 1.0 | 3.3 | 1.8 |
| 260434_at   | AT1G68330     | expressed protein                                        | 1.8 | 1.0 | 2.8 | 1.7 |
| 261023_at   | AT1G12200     | flavin-containing monooxygenase family protein / FM      | 1.4 | 1.0 | 2.2 | 1.4 |
| 263652_at   | AT1G04330     | expressed protein, EST gb:H76414 comes from this g       | 1.2 | 1.0 | 4.4 | 1.3 |
| 266265_at   | AT2G29340     | short-chain dehydrogenase/reductase (SDR) family p       | 1.6 | 1.0 | 3.7 | 1.3 |
| 267171_at   | AT2G37590     | Dof-type zinc finger domain-containing protein           | 1.5 | 1.0 | 5.8 | 1.2 |
| 248732_at   | AT5G48070     | putative xyloglucan endotransglycosylase/hydrolase,      | 1.5 | 1.0 | 3.6 | 1.2 |
| 256522_at   | AT1G66160     | U-box domain-containing protein, similar to immediat     | 2.0 | 1.0 | 1.9 | 1.2 |
| 267238_at   | AT2G44130     | kelch repeat-containing F-box family protein, very low   | 1.0 | 1.6 | 7.7 | 6.3 |
| 261265_at   | AT1G26800     | zinc finger (C3HC4-type RING finger) family protein, c   | 1.0 | 1.5 | 4.4 | 6.1 |
| 250012_x_at | AT5G18060     | auxin-responsive protein, putative, similar to auxin-inc | 1.0 | 1.3 | 2.2 | 3.5 |
| 258367_at   | AT3G14370     | protein kinase family protein, contains protein kinase   | 1.0 | 2.1 | 2.2 | 3.5 |
| 266908_at   | AT2G34650     | protein kinase PINOID (PID), identical to protein kina   | 1.0 | 1.5 | 2.5 | 3.3 |

|           |           |                                                          |     |     |     |     |
|-----------|-----------|----------------------------------------------------------|-----|-----|-----|-----|
| 252970_at | AT4G38850 | auxin-responsive protein / small auxin up RNA (SAUR)     | 1.0 | 1.4 | 2.2 | 3.0 |
| 257506_at | AT1G29440 | auxin-responsive family protein, similar to auxin-induc  | 1.0 | 1.5 | 2.1 | 2.9 |
| 259783_at | AT1G29510 | auxin-responsive protein, putative, similar to auxin-inc | 1.0 | 1.3 | 2.0 | 2.8 |
| 259784_at | AT1G29450 | auxin-responsive protein, putative, similar to auxin-inc | 1.0 | 1.3 | 1.6 | 2.7 |
| 263931_at | AT2G36220 | expressed protein                                        | 1.0 | 1.2 | 2.8 | 2.6 |
| 259773_at | AT1G29500 | auxin-responsive protein, putative, similar to auxin-inc | 1.0 | 1.3 | 1.6 | 2.6 |
| 252972_at | AT4G38840 | auxin-responsive protein, putative, auxin-inducible SAUR | 1.0 | 1.3 | 2.0 | 2.5 |
| 253736_at | AT4G28780 | GDSL-motif lipase/hydrolase family protein               | 1.0 | 1.2 | 1.3 | 2.3 |
| 245176_at | AT2G47440 | DNAJ heat shock N-terminal domain-containing prote       | 1.0 | 1.3 | 1.6 | 2.2 |
| 254424_at | AT4G21510 | F-box family protein                                     | 1.0 | 1.5 | 2.5 | 2.1 |
| 255931_at | AT1G12710 | F-box family protein / SKP1 interacting partner 3-relat  | 1.0 | 1.3 | 1.4 | 2.1 |
| 262653_at | AT1G14130 | 2-oxoglutarate-dependent dioxygenase, putative, sim      | 1.0 | 1.3 | 2.5 | 1.3 |
| 246464_at | AT5G16980 | NADP-dependent oxidoreductase                            | 1.0 | 1.2 | 3.1 | 1.3 |

#### LATE

|           |           |                                                     |     |     |     |     |
|-----------|-----------|-----------------------------------------------------|-----|-----|-----|-----|
| 251774_at | AT3G55840 | expressed protein                                   | 1.0 | 1.0 | 7.0 | 7.4 |
| 259864_at | AT1G72800 | nuM1-related                                        | 1.0 | 1.0 | 2.1 | 2.8 |
| 247774_at | AT5G58660 | oxidoreductase, 2OG-Fe(II) oxygenase family protein | 1.0 | 1.0 | 2.1 | 2.8 |
| 246781_at | AT5G27350 | sugar-porter family protein 1 (SFP1)                | 1.0 | 1.0 | 1.6 | 2.0 |
| 247617_at | AT5G60270 | lectin protein kinase family protein                | 1.0 | 1.0 | 2.6 | 1.8 |
| 248040_at | AT5G55970 | zinc finger (C3HC4-type RING finger) family protein | 1.0 | 1.0 | 2.6 | 1.8 |
| 263126_at | AT1G78460 | SOUL heme-binding family protein                    | 1.0 | 1.0 | 2.5 | 1.5 |
| 261443_at | AT1G28480 | glutaredoxin family protein                         | 1.0 | 1.0 | 4.0 | 1.4 |
| 256818_at | AT3G21420 | oxidoreductase, 2OG-Fe(II) oxygenase family protein | 1.0 | 1.0 | 2.4 | 1.3 |

#### GENES WITH OPPOSITE EXPRESSION PATTERN

##### EARLY

|             |                     |                                                         |     |     |     |     |
|-------------|---------------------|---------------------------------------------------------|-----|-----|-----|-----|
| 247940_at   | AT5G57190           | phosphatidylserine decarboxylase, putative              | 1.3 | 1.0 | 1.6 | 0.6 |
| 250004_at   | AT5G18750           | DNAJ heat shock N-terminal domain-containing prote      | 1.9 | 1.0 | 1.3 | 0.6 |
| 248686_at   | AT5G48540           | 33 kDa secretory protein-related                        | 2.4 | 1.0 | 2.0 | 0.6 |
| 245543_at   | AT4G15260           | UDP-glucuronosyl/UDP-glucosyl transferase family p      | 1.4 | 1.0 | 1.5 | 0.7 |
| 258282_at   | AT3G26910           | hydroxyproline-rich glycoprotein family protein         | 2.5 | 1.0 | 1.8 | 0.6 |
| 248134_at   | AT5G54860           | integral membrane transporter family protein)           | 1.7 | 1.0 | 2.0 | 0.8 |
| 258651_at   | AT3G09920           | phosphatidylinositol-4-phosphate 5-kinase family prot   | 1.6 | 1.0 | 1.1 | 0.4 |
| 266835_at   | AT2G29990           | pyridine nucleotide-disulphide oxidoreductase family    | 1.4 | 1.0 | 1.4 | 0.5 |
| 245051_at   | AT2G23320           | WRKY family transcription factor                        | 1.4 | 1.0 | 1.2 | 0.5 |
| 249480_s_at | AT5G38990;AT5G38990 | [AT5G38990, protein kinase family protein, contains p   | 1.4 | 1.0 | 2.1 | 0.7 |
| 252230_at   | AT3G49810           | U-box domain-containing protein                         | 1.3 | 1.0 | 1.1 | 0.6 |
| 264056_at   | AT2G28510           | Dof-type zinc finger domain-containing protein          | 1.3 | 1.0 | 1.2 | 0.5 |
| 262550_at   | AT1G31310           | hydroxyproline-rich glycoprotein family protein         | 1.2 | 1.0 | 2.4 | 0.7 |
| 253779_at   | AT4G28490           | leucine-rich repeat transmembrane protein kinase        | 1.2 | 1.0 | 2.3 | 0.8 |
| 253414_at   | AT4G33050           | calmodulin-binding family protein                       | 2.4 | 1.0 | 1.6 | 0.6 |
| 246858_at   | AT5G25930           | leucine-rich repeat family protein / protein kinase fam | 2.7 | 1.0 | 1.4 | 0.6 |
| 252501_at   | AT3G46880           | expressed protein                                       | 1.5 | 0.8 | 1.5 | 0.6 |
| 255895_at   | AT1G18020;AT1G18020 | [AT1G18020, 12-oxophytodienoate reductase, putativ      | 1.3 | 0.8 | 1.8 | 0.5 |
| 255502_at   | AT4G02410           | lectin protein kinase family protein                    | 2.6 | 0.7 | 1.6 | 0.6 |
| 245662_at   | AT1G28190           | expressed protein                                       | 2.8 | 0.7 | 1.6 | 0.6 |
| 267028_at   | AT2G38470           | WRKY family transcription factor                        | 2.0 | 0.4 | 1.3 | 0.6 |
| 262040_at   | AT1G80080           | protein kinase family protein                           | 0.6 | 1.3 | 0.5 | 2.6 |
| 253255_at   | AT4G34760           | auxin-responsive family protein, auxin-induced protei   | 0.6 | 1.2 | 0.6 | 1.6 |
| 245479_at   | AT4G16140           | proline-rich family protein                             | 1.0 | 1.2 | 0.7 | 1.3 |
| 261203_at   | AT1G12845           | expressed protein                                       | 0.6 | 1.0 | 0.4 | 2.1 |
| 262543_at   | AT1G34245           | expressed protein                                       | 0.6 | 1.0 | 0.2 | 1.5 |

##### LATE

|           |           |                                       |     |     |     |     |
|-----------|-----------|---------------------------------------|-----|-----|-----|-----|
| 249188_at | AT5G42830 | transferase family protein            | 1.0 | 1.0 | 2.7 | 0.6 |
| 253044_at | AT4G37290 | expressed protein                     | 1.0 | 1.0 | 2.4 | 0.4 |
| 260727_at | AT1G48100 | glycoside hydrolase family 28 protein | 1.0 | 1.0 | 0.4 | 1.2 |

##### COMPLEX

### EARLY

|           |           |                                                         |     |     |     |     |
|-----------|-----------|---------------------------------------------------------|-----|-----|-----|-----|
| 262505_at | AT1G21680 | expressed protein                                       | 0.8 | 1.0 | 2.0 | 1.3 |
| 248164_at | AT5G54490 | calcium-binding EF-hand protein, putative, similar to l | 0.7 | 0.4 | 3.1 | 1.8 |
| 247543_at | AT5G61600 | encodes a member of the ERF (ethylene response fa       | 0.5 | 0.5 | 2.0 | 2.1 |
| 255926_at | AT1G22190 | AP2 domain-containing transcription factor, putative,   | 0.4 | 0.8 | 0.5 | 1.0 |
| 261648_at | AT1G27730 | zinc finger (C2H2 type) family protein (ZAT10) / salt-t | 0.6 | 0.2 | 1.0 | 0.7 |
| 259982_at | AT1G76410 | zinc finger (C3HC4-type RING finger) family protein, c  | 0.5 | 1.6 | 0.2 | 0.4 |
| 247074_at | AT5G66590 | allergen V5/Tpx-1-related family protein                | 0.5 | 1.2 | 0.3 | 0.6 |
| 267614_at | AT2G26710 | cytochrome p450 family (BAS1)                           | 0.7 | 1.6 | 2.3 | 5.4 |
| 263325_at | AT2G04240 | zinc finger (C3HC4-type RING finger) family protein     | 0.8 | 1.5 | 1.7 | 2.8 |
| 252965_at | AT4G38860 | auxin-responsive protein (SAUR16)                       | 0.8 | 1.4 | 2.3 | 3.4 |
| 259787_at | AT1G29460 | auxin-responsive protein (SAUR65)                       | 0.8 | 1.3 | 2.2 | 3.6 |
| 266447_at | AT2G43290 | calmodulin-like protein (MSS3)                          | 0.8 | 1.2 | 1.4 | 3.0 |
| 265877_at | AT2G42380 | bZIP transcription factor family protein                | 0.6 | 1.2 | 1.3 | 2.6 |
| 246200_at | AT4G37240 | expressed protein                                       | 0.8 | 1.2 | 1.5 | 2.3 |
| 246926_at | AT5G25240 | expressed protein                                       | 0.7 | 1.2 | 2.2 | 3.7 |
| 265732_at | AT2G01300 | expressed protein                                       | 0.7 | 1.2 | 3.1 | 4.8 |
| 248282_at | AT5G52900 | expressed protein                                       | 0.6 | 1.4 | 1.0 | 2.0 |
| 249494_at | AT5G39050 | transferase family protein                              | 1.5 | 1.4 | 1.8 | 0.6 |
| 255933_at | AT1G12750 | rhomboid family protein                                 | 1.5 | 1.2 | 1.6 | 0.8 |
| 253573_at | AT4G31020 | expressed protein                                       | 2.7 | 1.5 | 5.8 | 0.7 |
| 253483_at | AT4G31910 | transferase family protein                              | 1.5 | 1.2 | 1.6 | 0.8 |
| 267592_at | AT2G39710 | aspartyl protease family protein                        | 2.4 | 1.3 | 2.5 | 1.0 |
| 246993_at | AT5G67450 | zinc finger (C2H2 type) protein 1 (AZF1)                | 6.2 | 1.8 | 1.8 | 1.0 |
| 246389_at | AT1G77380 | amino acid carrier, putative                            | 1.3 | 1.0 | 1.0 | 0.4 |
| 245119_at | AT2G41640 | expressed protein                                       | 2.0 | 0.8 | 2.5 | 1.4 |
| 247625_at | AT5G60200 | Dof-type zinc finger domain-containing protein          | 1.4 | 0.8 | 3.9 | 1.7 |
| 251910_at | AT3G53810 | lectin protein kinase                                   | 2.3 | 0.8 | 2.2 | 1.2 |
| 245041_at | AT2G26530 | expressed protein                                       | 1.2 | 0.4 | 2.0 | 1.0 |
| 254231_at | AT4G23810 | WRKY family transcription factor                        | 5.8 | 0.7 | 1.0 | 0.5 |
| 251832_at | AT3G55150 | exocyst subunit EXO70 family protein                    | 3.4 | 0.8 | 0.5 | 0.1 |
| 264746_at | AT1G62300 | WRKY family transcription factor                        | 1.6 | 0.6 | 0.7 | 0.2 |



**SI - Table 4B Fold-change of BIK regulated genes.**

The comparisons from left-to-right are: BIK- vs. mock-treated 0.5h; BL- vs. mock-treated 0.5h; BIK- vs. BIK specific

| Affymetrix nc        | Accession no.       | Annotation                                               | treatment/mock |         |        |       |
|----------------------|---------------------|----------------------------------------------------------|----------------|---------|--------|-------|
|                      |                     |                                                          | BIK 0.5h       | BL 0.5h | BIK 2h | BL 2h |
| <b>DOWNREGULATED</b> |                     |                                                          |                |         |        |       |
| <b>EARLY</b>         |                     |                                                          |                |         |        |       |
| 252646_at            | AT3G44610           | protein kinase family protein                            | 0.8            | 1.0     | 0.4    | 1.0   |
| 248190_at            | AT5G54120           | expressed protein                                        | 0.8            | 1.0     | 0.4    | 1.0   |
| 248191_at            | AT5G54130           | calcium-binding EF hand family protein                   | 0.8            | 1.0     | 0.3    | 1.0   |
| 258432_at            | AT3G16570           | rapid alkalization factor (RALF) family protein          | 0.5            | 1.0     | 0.4    | 1.0   |
| 247601_at            | AT5G60850           | Dof-type zinc finger domain-containing protein           | 0.5            | 1.0     | 0.6    | 1.0   |
| 248801_at            | AT5G47370           | homeobox-leucine zipper protein 2 (HAT2)                 | 0.5            | 1.0     | 0.4    | 1.0   |
| 245229_at            | AT4G25620           | hydroxyproline-rich glycoprotein family protein          | 0.5            | 1.0     | 0.5    | 1.0   |
| <b>LATE</b>          |                     |                                                          |                |         |        |       |
| 257066_at            | AT3G18280           | protease inhibitor/seed storage/lipid transfer protein ( | 1.0            | 1.0     | 0.4    | 1.0   |
| <b>UPREGULATED</b>   |                     |                                                          |                |         |        |       |
| <b>EARLY</b>         |                     |                                                          |                |         |        |       |
| 245369_at            | AT4G15975           | zinc finger (C3HC4-type RING finger) family protein      | 2.3            | 1.0     | 3.3    | 1.0   |
| 256337_at            | AT1G72060           | expressed protein                                        | 2.2            | 1.0     | 6.0    | 1.0   |
| 258537_at            | AT3G04210           | disease resistance protein (TIR-NBS class)               | 2.2            | 1.0     | 3.2    | 1.0   |
| 260602_at            | AT1G55920           | serine O-acetyltransferase                               | 2.2            | 1.0     | 2.2    | 1.0   |
| 253737_at            | AT4G28703           | expressed protein                                        | 2.0            | 1.0     | 6.1    | 1.0   |
| 259875_s_at          | AT1G76690;AT1G76690 | [AT1G76690, 12-oxophytodienoate reductase (OPR2          | 2.0            | 1.0     | 6.1    | 1.0   |
| 262072_at            | AT1G59590           | expressed protein                                        | 2.0            | 1.0     | 2.1    | 1.0   |
| 257398_at            | AT2G01990           | expressed protein                                        | 1.9            | 1.0     | 2.6    | 1.0   |
| 257805_at            | AT3G18830           | monosaccharide-H <sup>+</sup> -symporter                 | 1.6            | 1.0     | 2.6    | 1.0   |
| 265158_at            | AT1G31040           | zinc-binding protein-related                             | 1.4            | 1.0     | 4.4    | 1.0   |
| 249435_at            | AT5G39970           | expressed protein                                        | 1.4            | 1.0     | 2.7    | 1.0   |
| 261382_at            | AT1G05470           | endonuclease/exonuclease/phosphatase family prote        | 1.4            | 1.0     | 2.6    | 1.0   |
| 254204_at            | AT4G24160           | hydrolase, alpha/beta fold family protein                | 1.4            | 1.0     | 2.3    | 1.0   |
| 264279_s_at          | AT1G78820;AT1G78820 | [AT1G78820, curculin-like (mannose-binding) lectin f     | 1.3            | 1.0     | 1.8    | 1.0   |
| 251162_at            | AT3G63300           | expressed protein                                        | 1.3            | 1.0     | 2.1    | 1.0   |
| 252047_at            | AT3G52490           | heat shock protein-related                               | 1.2            | 1.0     | 2.4    | 1.0   |
| <b>LATE</b>          |                     |                                                          |                |         |        |       |
| 255941_at            | AT1G20350           | mitochondrial import inner membrane translocase sul      | 1.0            | 1.0     | 2.7    | 1.0   |
| 252586_at            | AT3G45610           | Dof-type zinc finger domain-containing protein           | 1.0            | 1.0     | 2.6    | 1.0   |
| 251039_at            | AT5G02020           | expressed protein                                        | 1.0            | 1.0     | 2.3    | 1.0   |
| 247610_at            | AT5G60630           | expressed protein                                        | 1.0            | 1.0     | 2.2    | 1.0   |
| 246321_at            | AT1G16640           | transcriptional factor B3 family protein                 | 1.0            | 1.0     | 2.2    | 1.0   |
| 247205_at            | AT5G64890           | expressed protein                                        | 1.0            | 1.0     | 2.2    | 1.0   |
| 249558_at            | AT5G38310           | expressed protein                                        | 1.0            | 1.0     | 1.9    | 1.0   |

**SI - Table 4C Fold-change of BL regulated genes.**

The comparisons from left-to-right are: BIK- vs. mock-treated 0.5h; BL- vs. mock-treated 0.5h; BIK- vs. BL specific

| Affymetrix nc      | Accession no. | Annotation                                             | treatment/mock |     |     |     |
|--------------------|---------------|--------------------------------------------------------|----------------|-----|-----|-----|
|                    |               |                                                        | 0.5h           |     | 2h  |     |
|                    |               |                                                        | BIK            | BL  | BIK | BL  |
| <b>UPREGULATED</b> |               |                                                        |                |     |     |     |
| <b>EARLY</b>       |               |                                                        |                |     |     |     |
| 261768_at          | AT1G15550     | gibberellin 3-beta-dioxygenase / gibberellin 3 beta-hy | 1.0            | 1.3 | 1.0 | 1.9 |
| 249947_at          | AT5G19200     | short-chain dehydrogenase/reductase (SDR) family p     | 1.0            | 1.2 | 1.0 | 2.5 |

**SI - Table 5.** Primers used in quantitative RT-PCR

| Gene (At-code)                              | Forward Primer            | Reverse Primer            |
|---------------------------------------------|---------------------------|---------------------------|
| <i>DWF4</i> (At3g50660)                     | GTGATCTCAGCCGTACATTTGGA   | CACGTGCAAAAACTACCACTTCCT  |
| <i>CPD</i> (At5g05690)                      | CCCAAACCACTTCAAAGATGCT    | GGGCCTGTCGTTACCGAGTT      |
| <i>BAS1</i> (At2g26710)                     | TTGGCTTCATACCGTTTGGC      | TTACAGCGAGTGTCAATTTGGC    |
| <i>ROT3</i> (At4g36380)                     | ATTGGCGCGTTCCTCAGAT       | CAAGACGCCAAAGTGAGAACA     |
| <i>BR6OX1</i> (At5g38970)                   | TGGCCAATCTTTGGCGAA        | TCCCGTATCGGAGTCTTTGGT     |
| <i>BR6OX2</i> (At3g30180)                   | CAATAGTCTCAATGGACGCAGAGT  | AACCGCAGCTATGTTGCATG      |
| <i>BR11</i> (At4g39400)                     | GGTGAAACAGCACGCAAACT      | CACGCAACCGCAACTTTTAA      |
| <i>BIN2</i> (At4g18710)                     | GTGACTTTGGCAGTGCGAAAC     | CAGCATTTTCTCCGGGAAATAATGG |
| <i>BSU1</i> (At1g03445)                     | GGCGGTTTTTCGTCAACAATTCC   | CCATCTAAACTGATCTCGGGTAAGG |
| <i>BES1</i> (At1g19350)                     | CAACCTCGCCTACCTTCAATCTC   | TTGGCTGTTCTCAAACCTTAACTCG |
| <i>BZR1</i> (At1g75080)                     | CCTCTACATTCTTCCCTTTCCTCAG | GCTTAGCGATAGATTCCCAGTTAGG |
| <i>Saur-AC1</i> (At4g38850)                 | TTGGGTGCTAAGCAAATTATTTCG  | TCTCCTACATAGACCGCCATGA    |
| <i>CDKA1;1</i> (At3g48750)                  | ATTGCGTATTGCCACTCTCATAGG  | TCCTGACAGGGATAACCGAATGC   |
| <i>EEF1<math>\alpha</math>4</i> (At5g60390) | CTGGAGGTTTTGAGGCTGGTAT    | CCAAGGGTGAAAGCAAG AAGA    |

**Table S6.** Primers used for *in vitro* mutagenesis of BIN2

| Mutation | Forward primer                                      | Reverse primer                                      |
|----------|-----------------------------------------------------|-----------------------------------------------------|
| M115L    | 5'-GAGCTTTTCTTGAAGTTGGTTCTGGAGTATGTCCTGAGAGCTTG-3'  | 5'-CAAGCTCTCAGGGACATACTCCAGAACCAAGTTCAAGAAAAGCTC-3' |
| T65/K    | 5'-GGAGACTGGAGAAAAGGTGGCGATAAAGAAGGTTTGGCAAGATAG-3' | 5'-CTATCTTGCAAAACCTTCTTTATCGCCACCTTTTCTCCAGTCTCC-3' |
| Y117/F   | 5'-GAGCTTTTCTTGAAGTTGGTTATGGAGTTTGTCCCTGAGAGCTTG-3' | 5'-CAAGCTCTCAGGGACAAACTCCATAACCAAGTTCAAGAAAAGCTC-3' |
